# Supplementary material for: EP300 and SIRT1/6 Co-Regulate Lapatinib Sensitivity Via Modulating FOXO3-Acetylation and Activity in Breast Cancer
Source: MDPI journal article supplement (doi:10.3390/cancers11081067), 2019-07-28
Supplement: s1 [file s1]

Supplementary Fig. S6

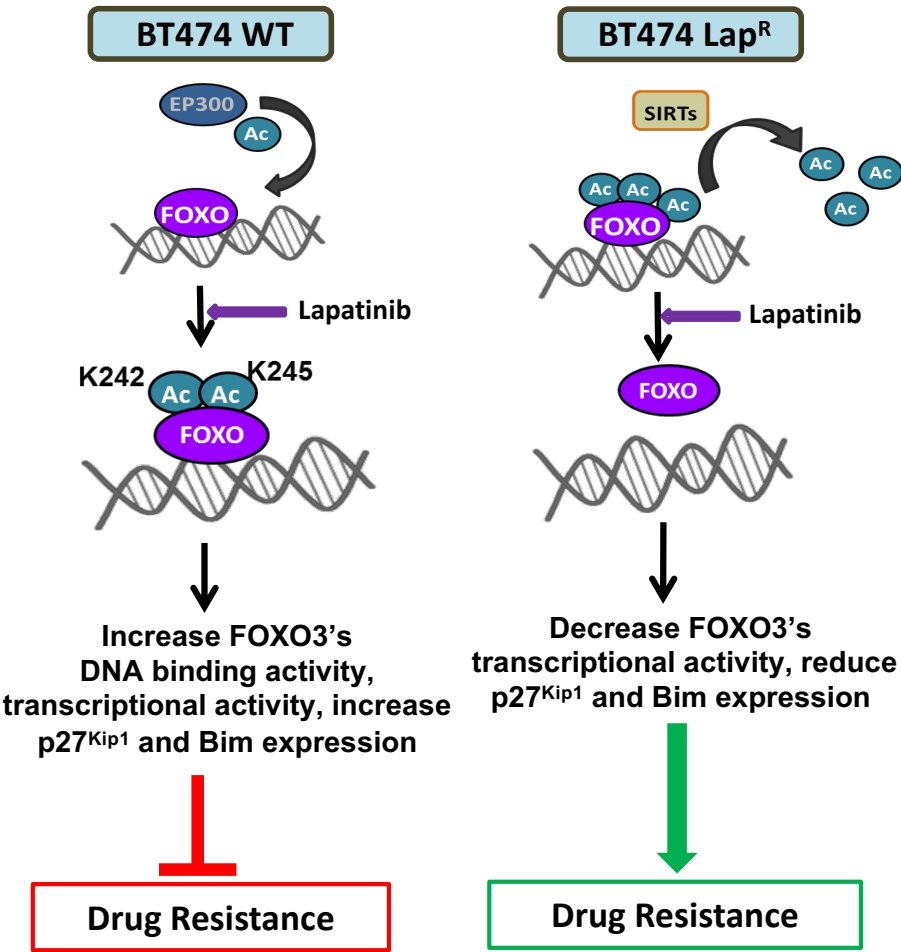

**Supplementary figure S6.**  
Schematic model showing the regulation of FOXO3 acetylation by EP300 and SIRT1/6 and its subsequent outcome on Lapatinib sensitivity and resistance in breast cancer cells
