# Supplementary material for: EP300 and SIRT1/6 Co-Regulate Lapatinib Sensitivity Via Modulating FOXO3-Acetylation and Activity in Breast Cancer
Source: MDPI journal article supplement (doi:10.3390/cancers11081067), 2019-07-28
Supplement: s1 [file s1]

## Supplementary Fig. S7A

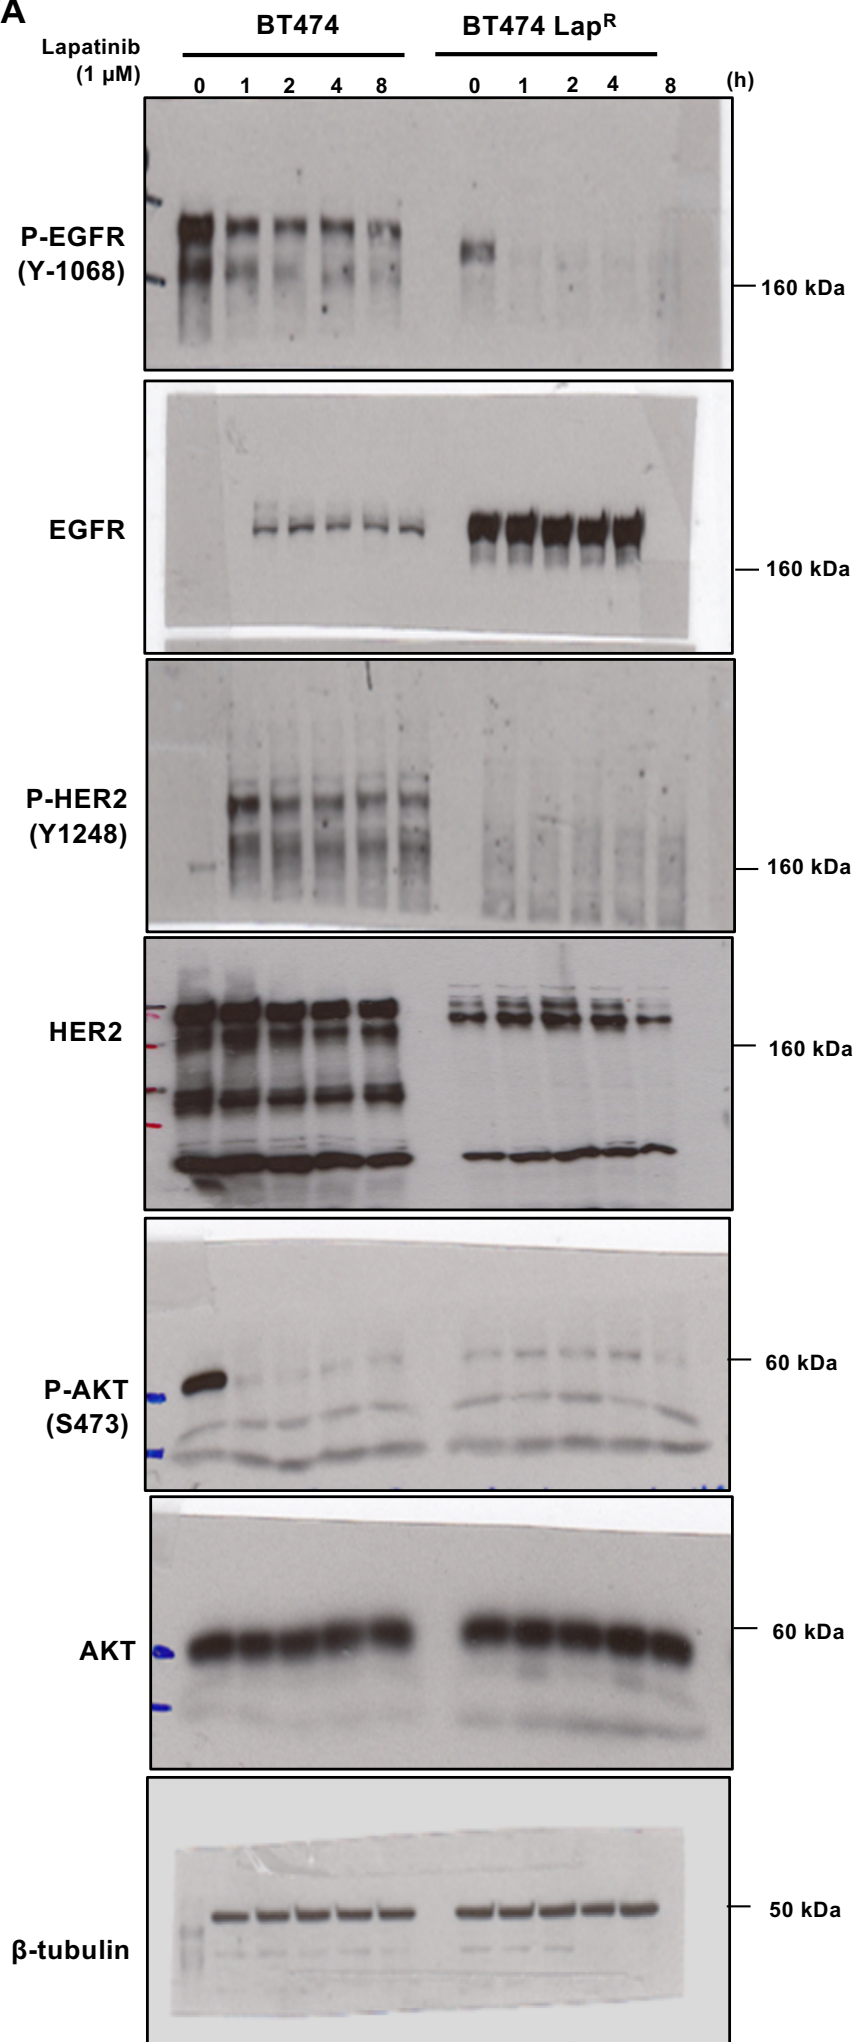

## Supplementary Figure S7A

Original blots for the cropped/composite Fig. 1A

Supplementary Fig. S7B

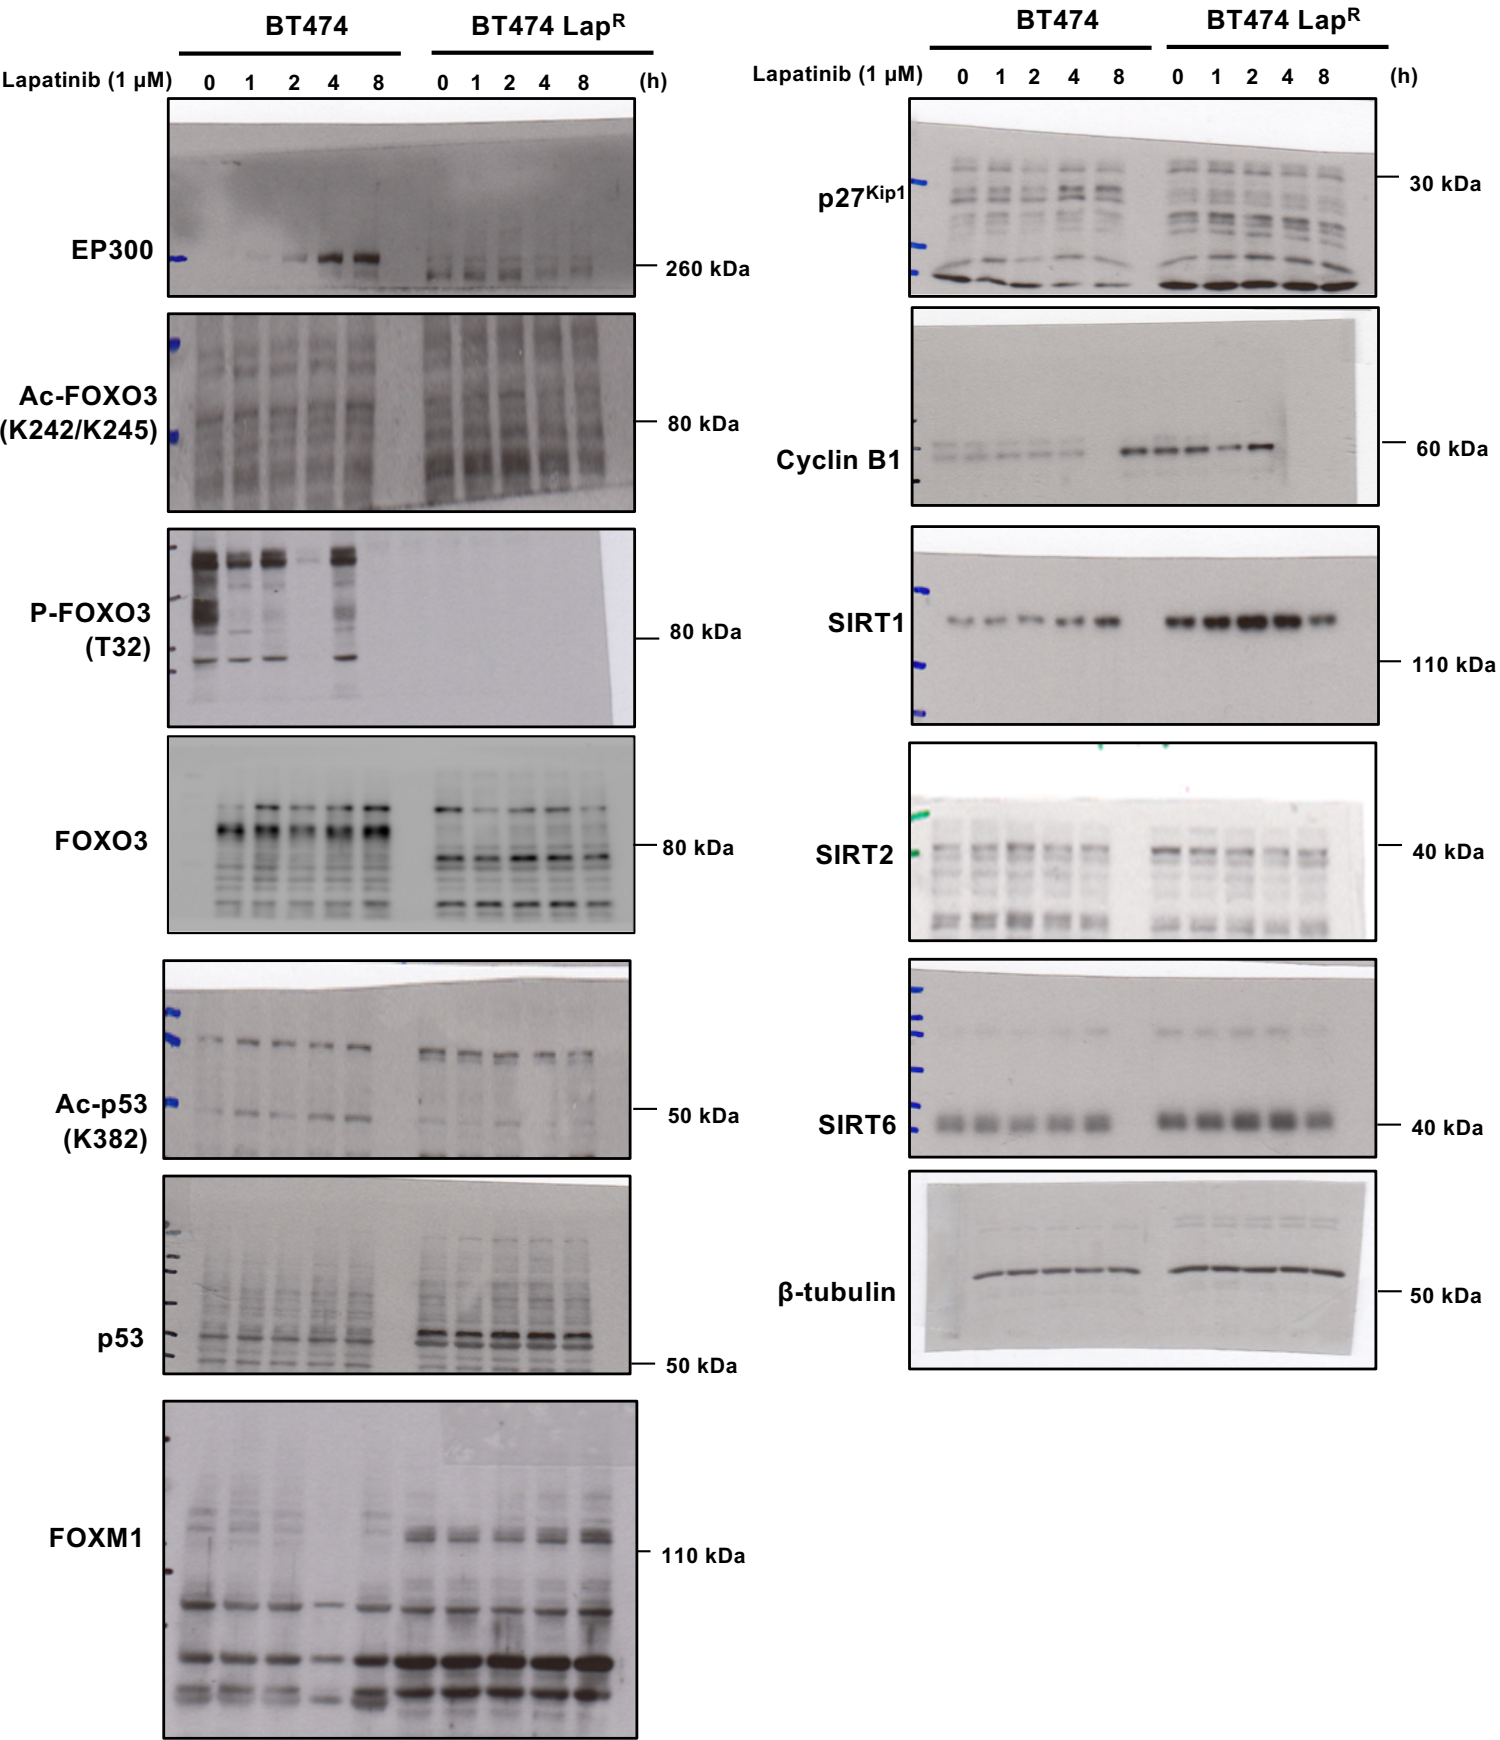

Supplementary Figure S7B  
Original blots for the cropped/composite Fig. 1B



Supplementary Fig. S7C

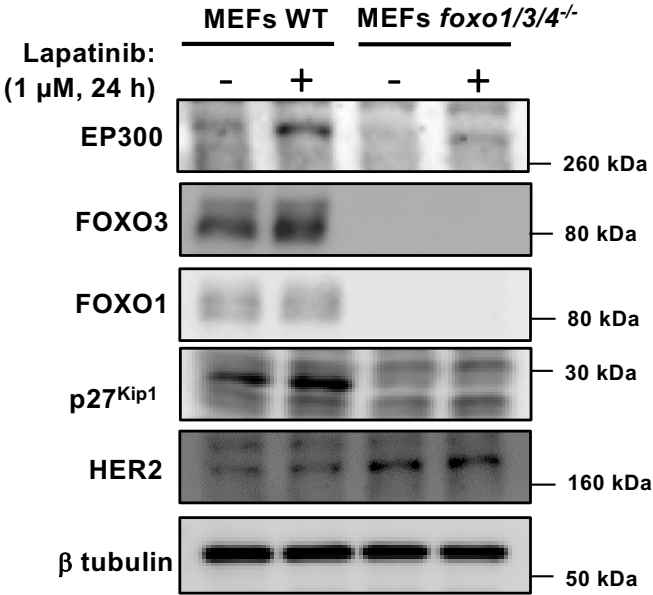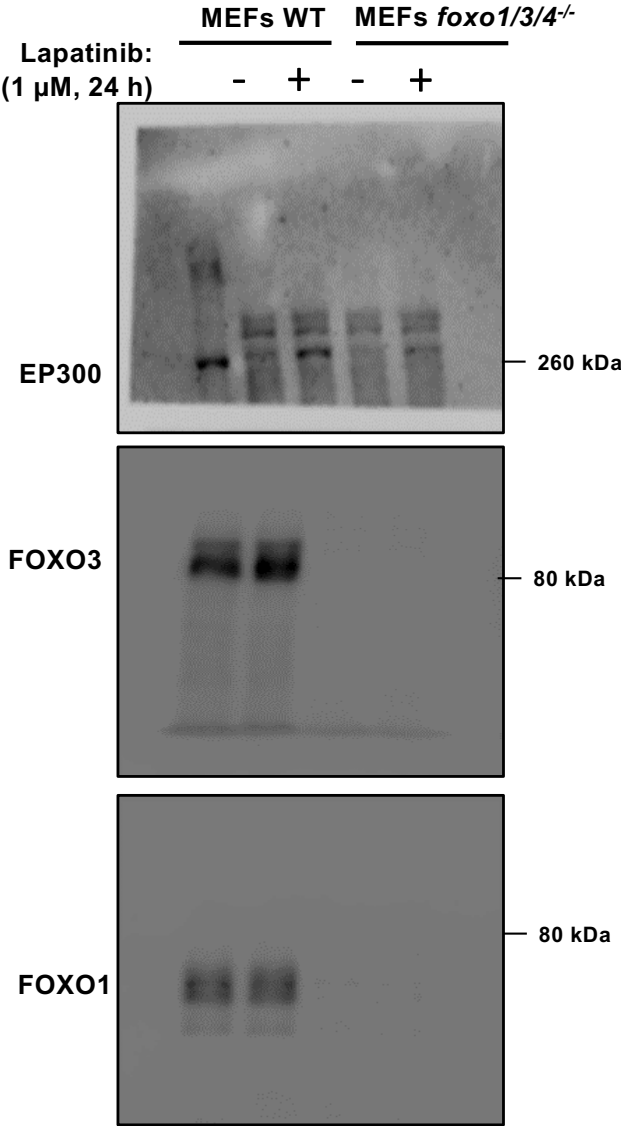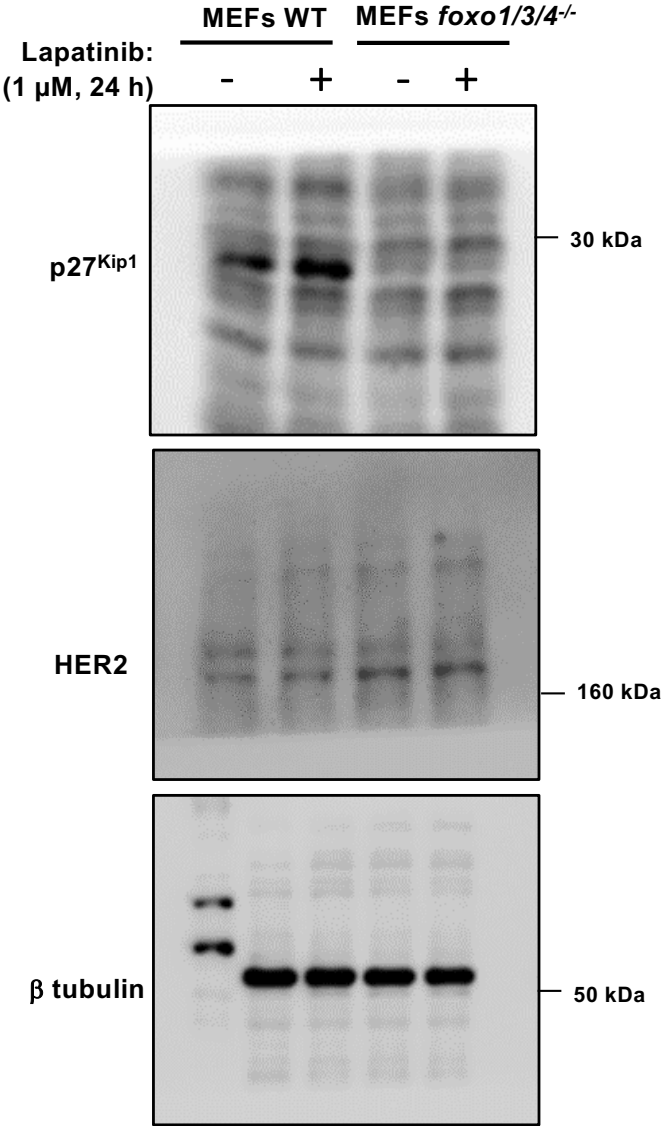

Supplementary Figure S7C  
Original blots for the cropped/composite Fig. 2B

Supplementary Fig. S7D

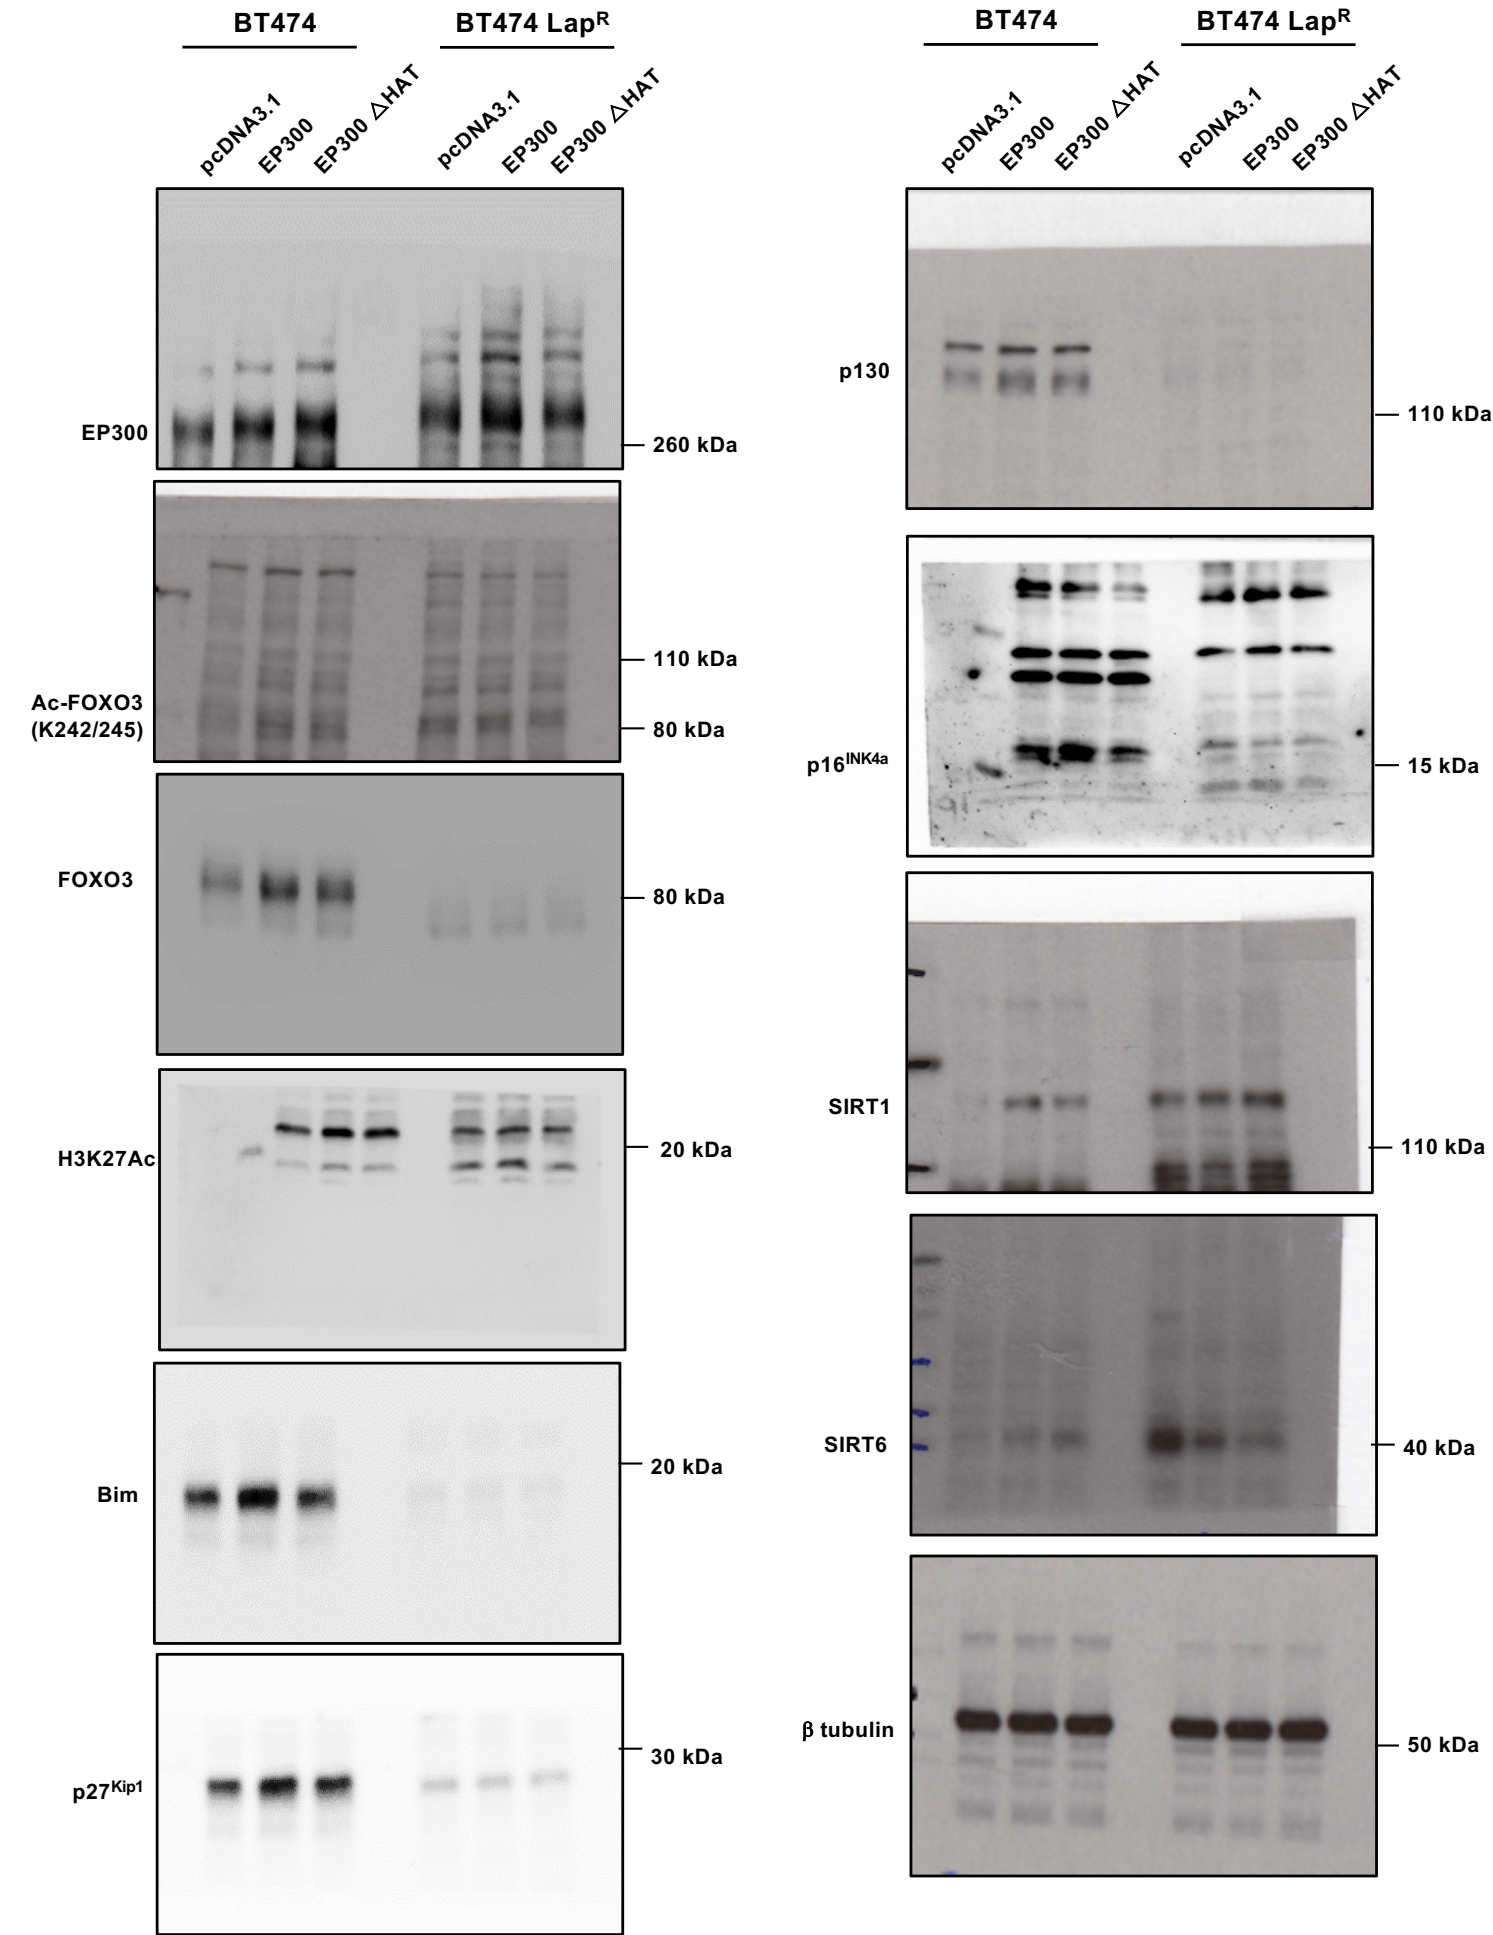

Supplementary Figure S7D  
Original blots for the cropped/composite Fig. 4A

Supplementary Fig. S7E

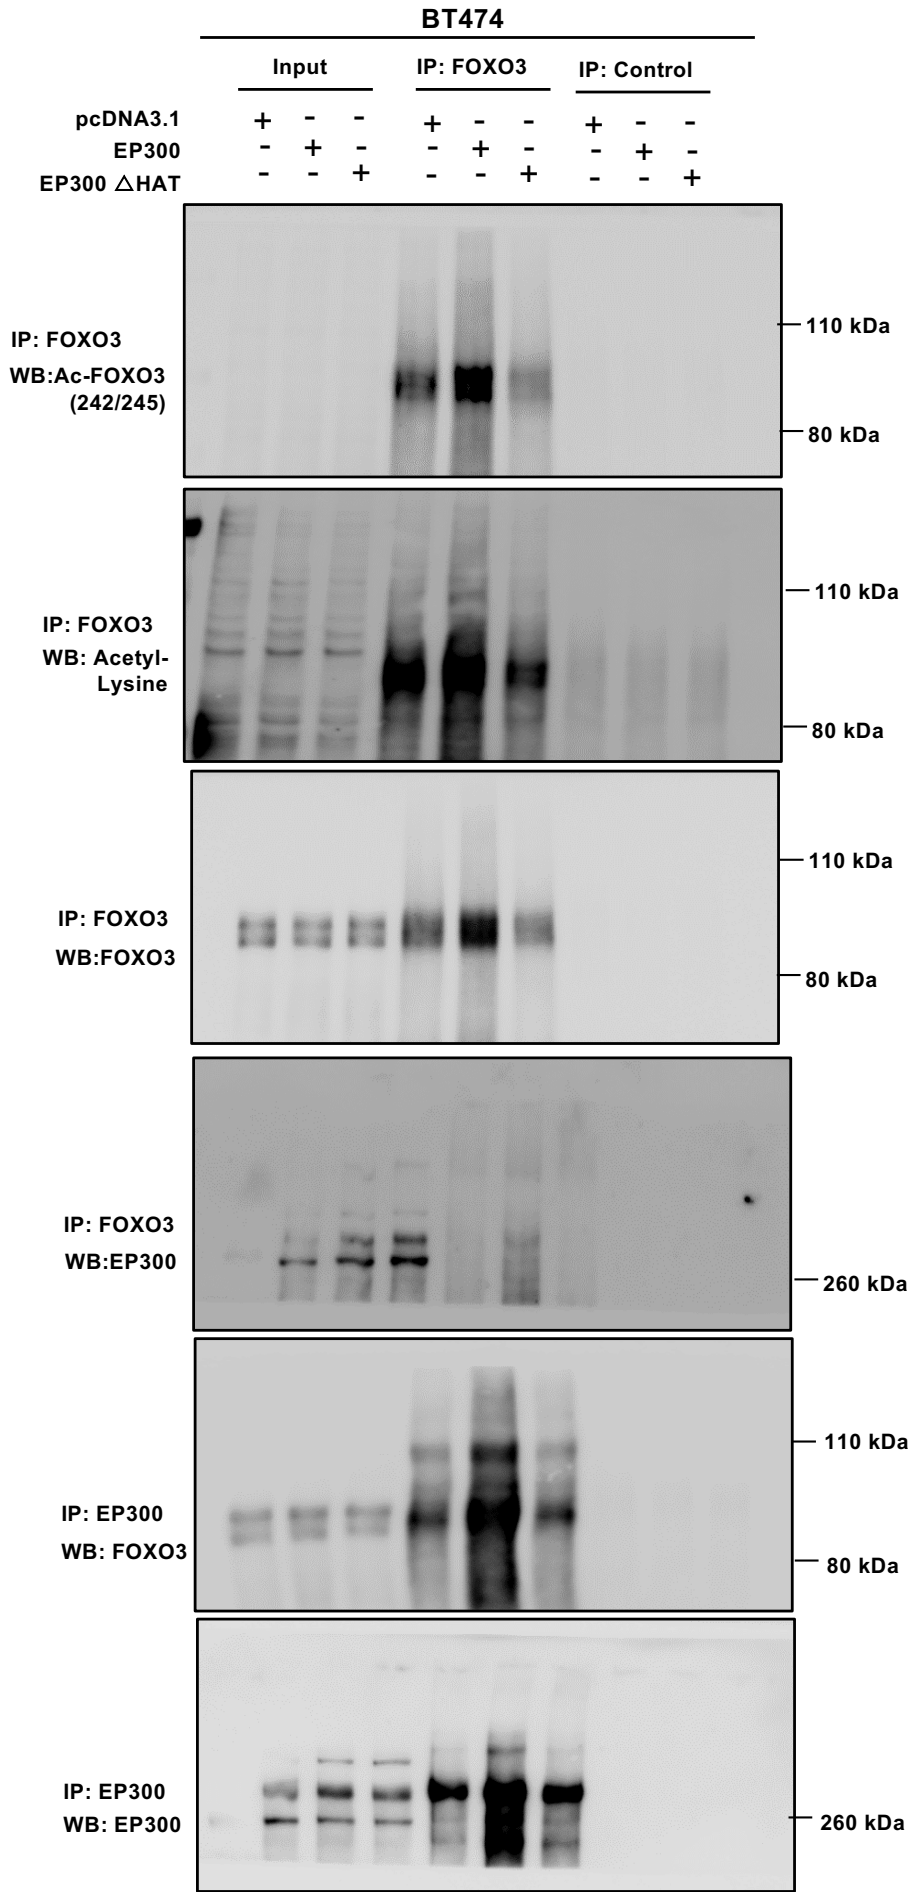

Supplementary Figure S7E  
Original blots for the cropped/composite Fig. 4B



Supplementary Fig. S7F

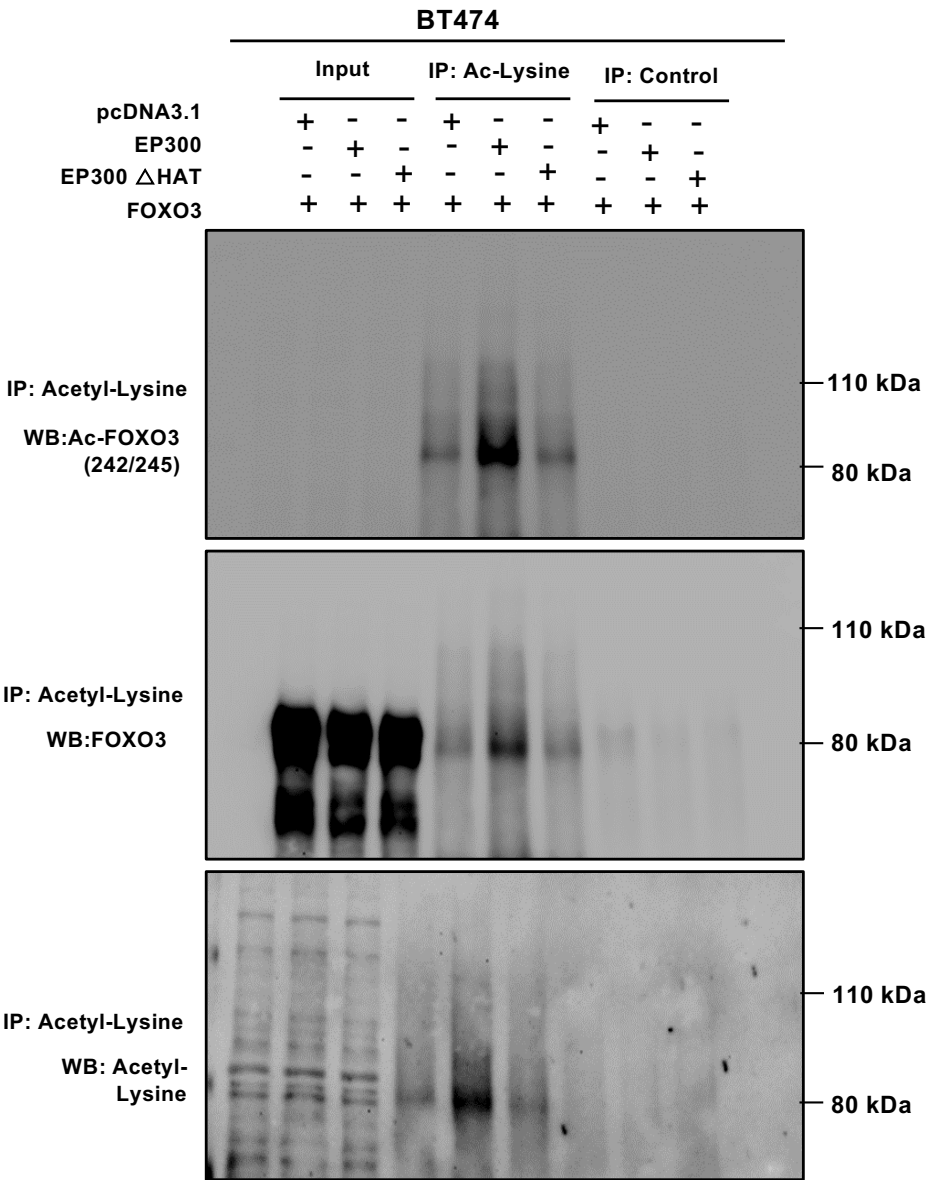

Supplementary Figure S7F

Original blots for the cropped/composite Fig. 4C

Supplementary Fig. S7G

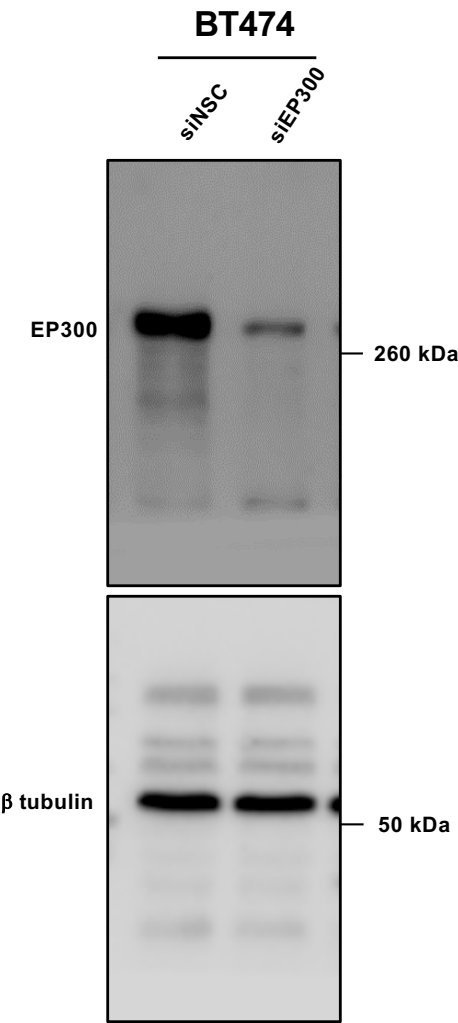

Supplementary Figure S7G

Original blots for the cropped/composite Fig. 5B

Supplementary Fig. S7H

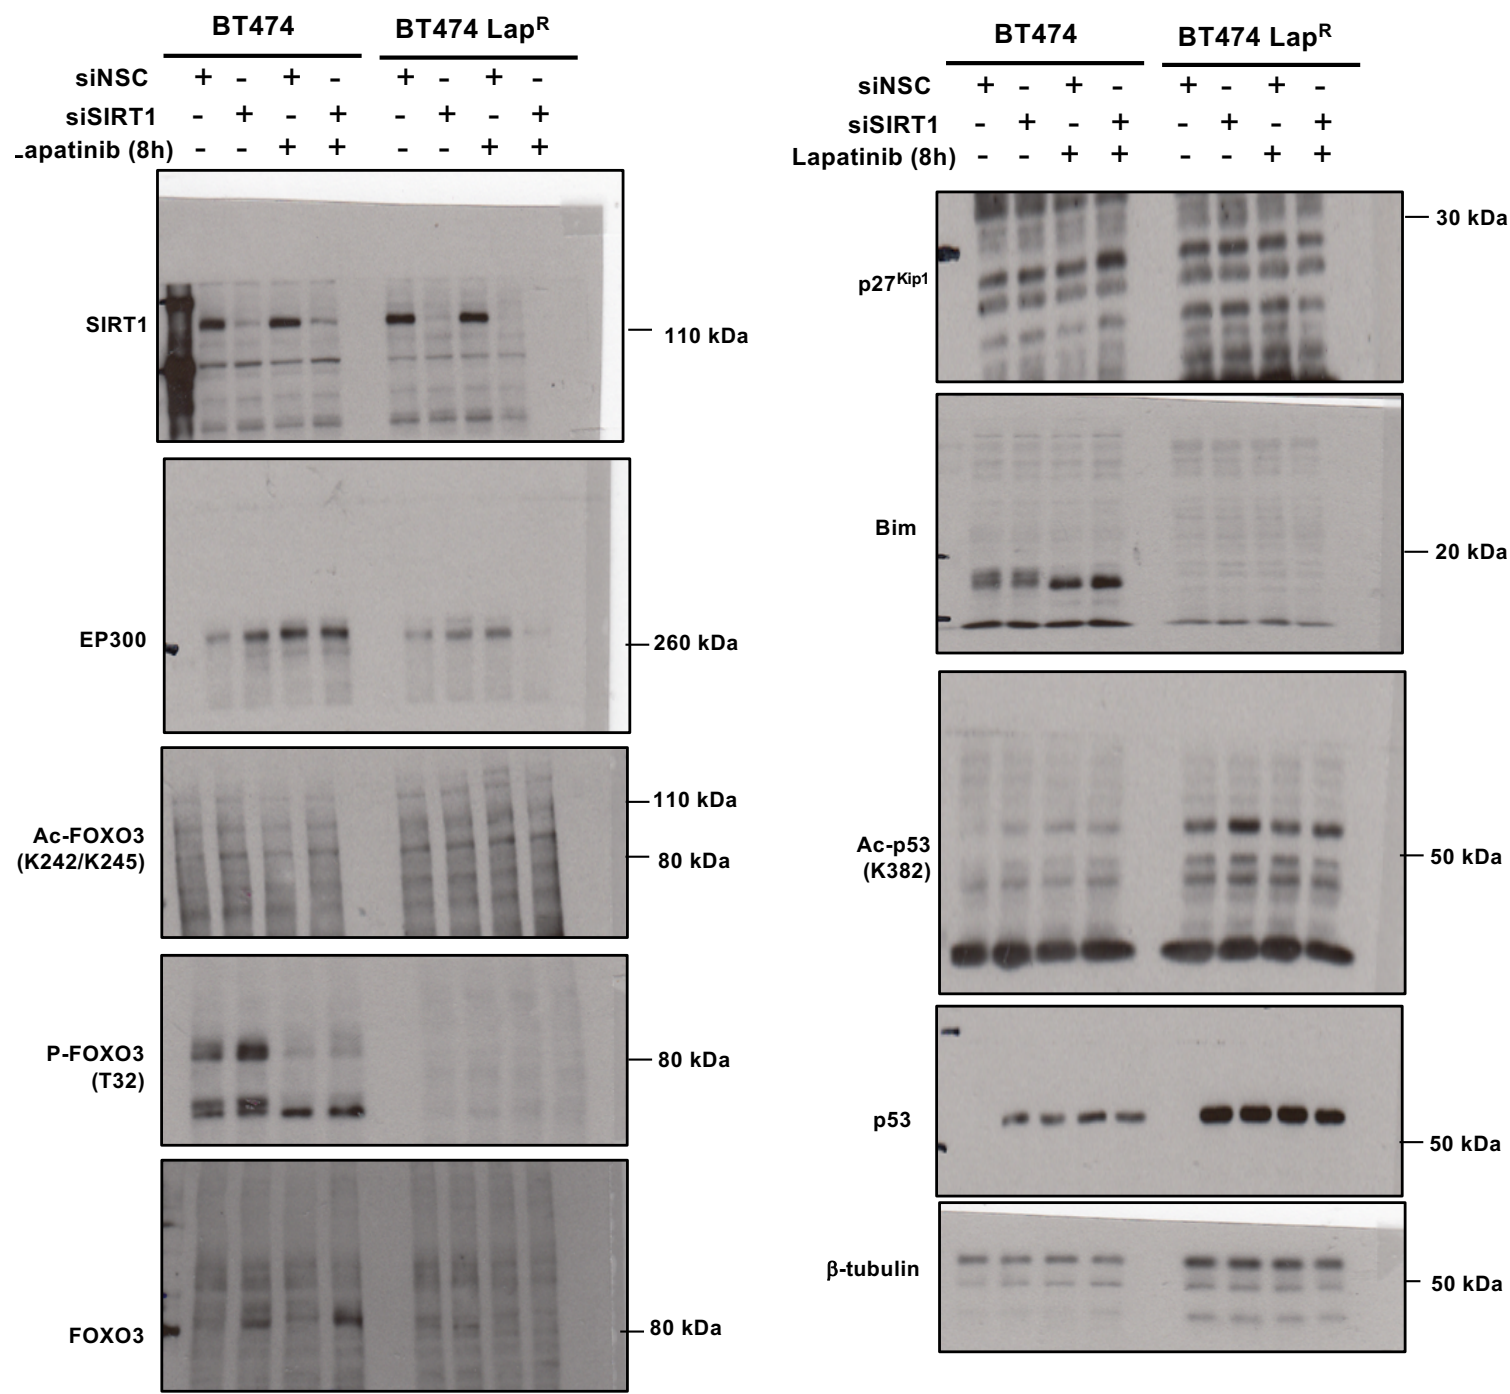

Supplementary Figure S7H

Original blots for the cropped/composite Fig. 6A

### Supplementary Fig. S7I

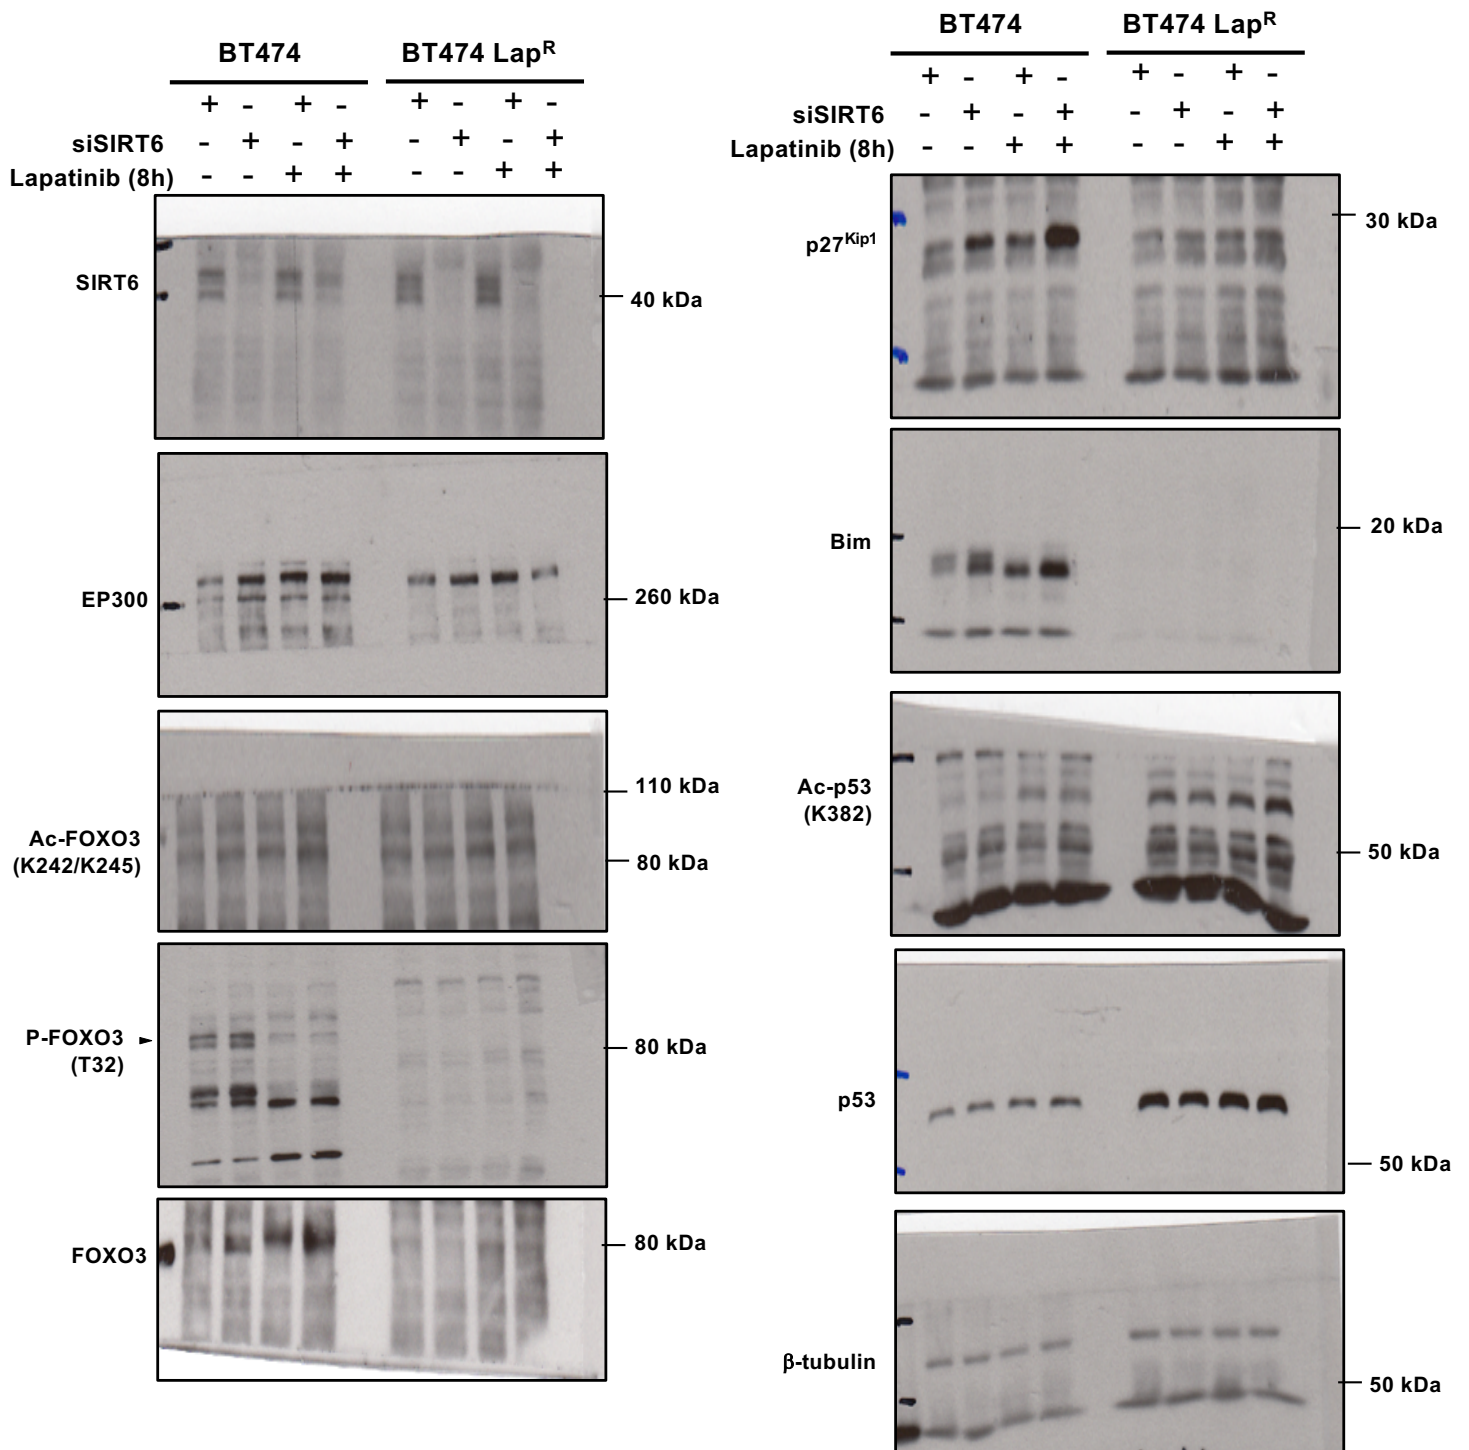

### Supplementary Figure S7I

Original blots for the cropped/composite Fig. 6B



Supplementary Fig. S7J

BT474

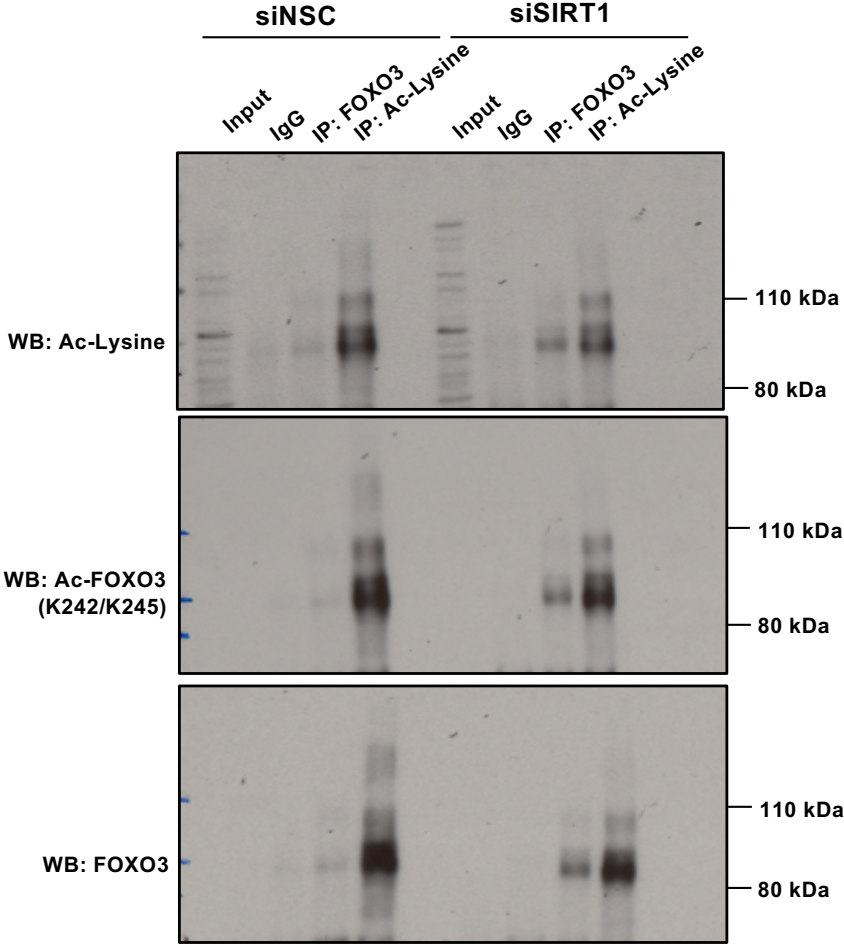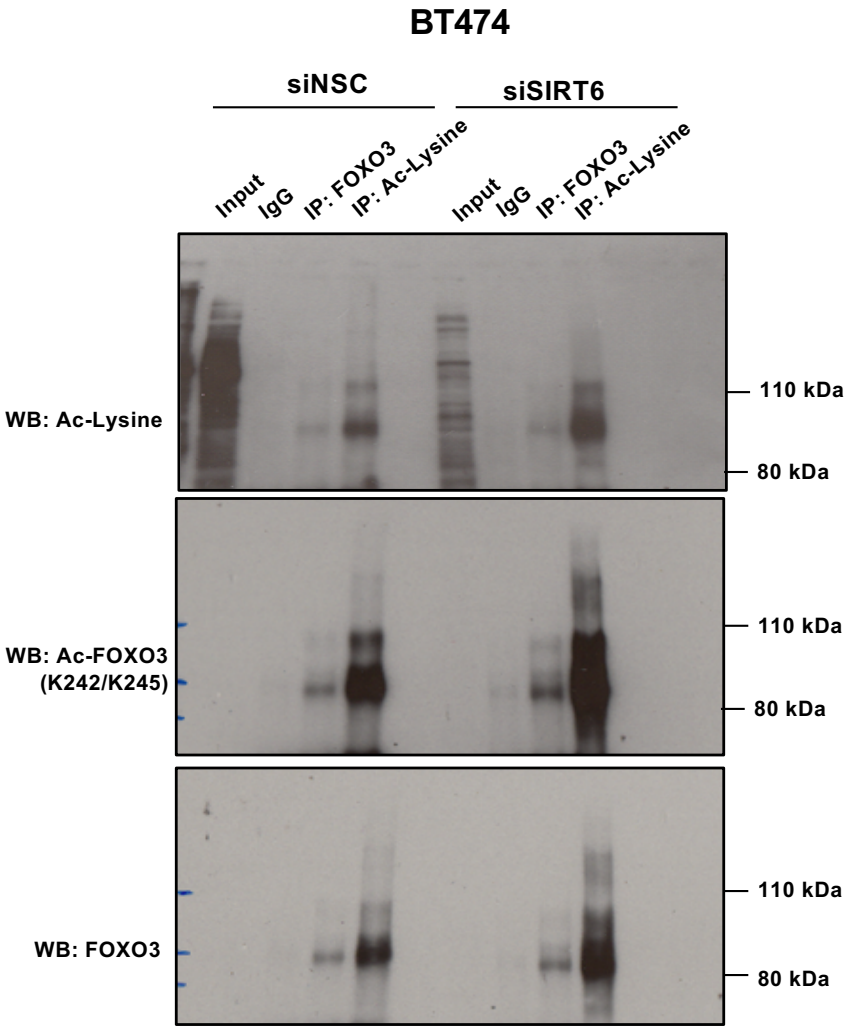

Supplementary Figure S7J

Original blots for the cropped/composite Fig. 6C

Supplementary Fig. S7K

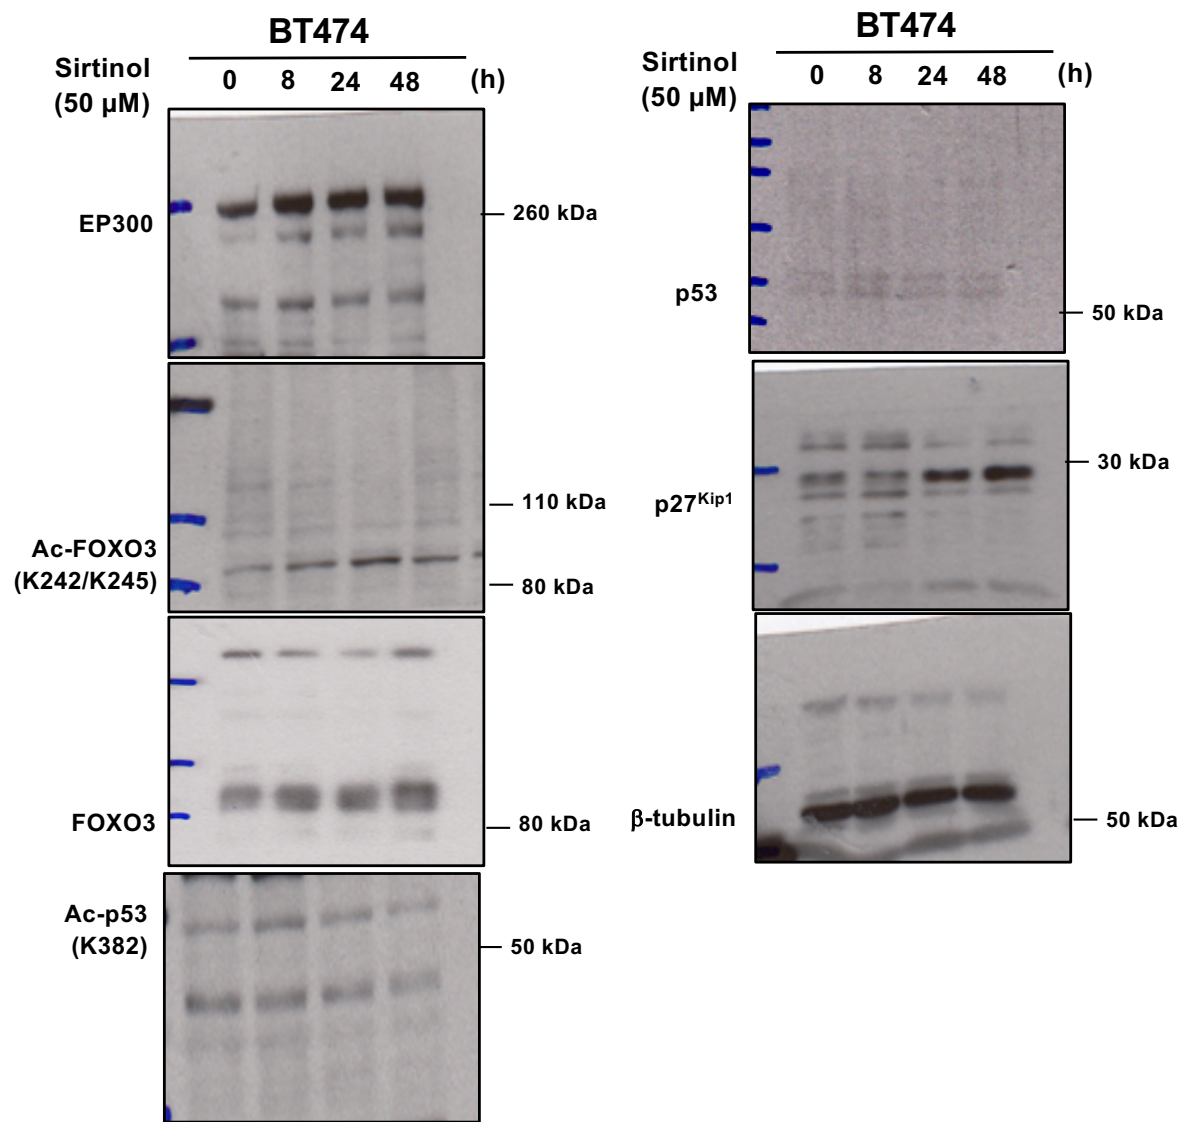

Supplementary Figure S7K  
Original blots for the cropped/composite Fig. 7B

**Supplementary Fig. S7L**

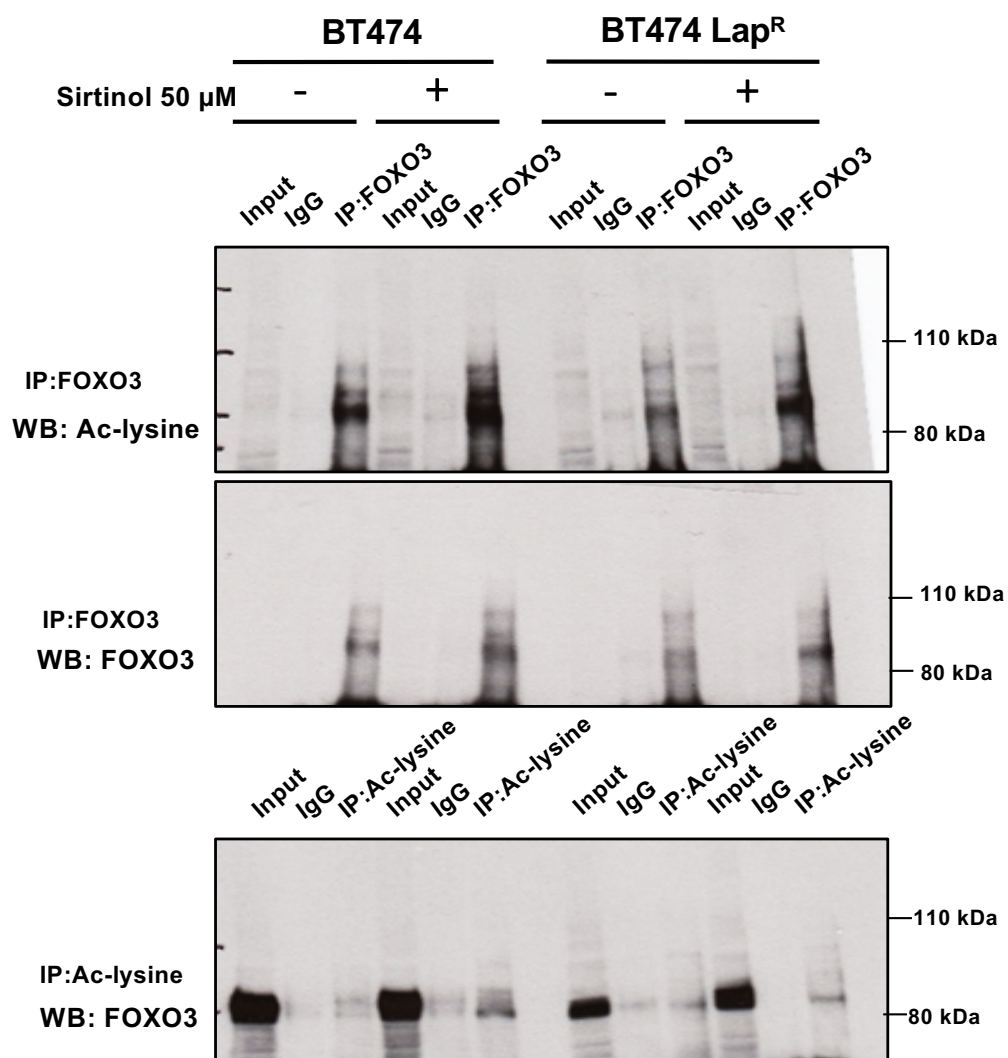

**Supplementary Figure S7L**

Original blots for the cropped/composite Fig. 7C



Supplementary Fig. S7M

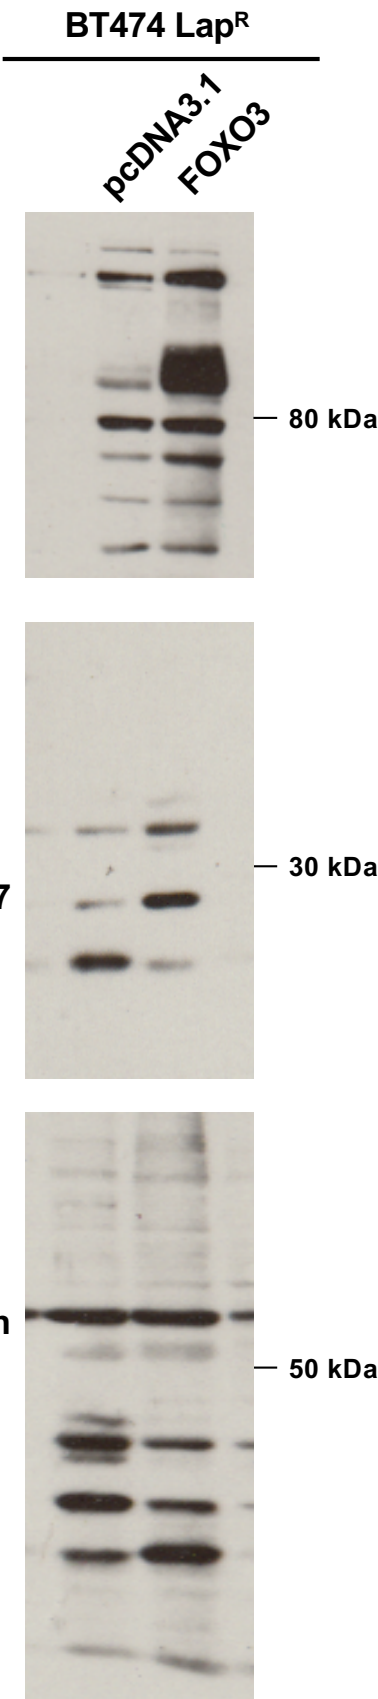

**Supplementary Fig. S7M**  
Original blots for the cropped/composite for  
Supplementary Fig S2A

Supplementary Fig. S7N

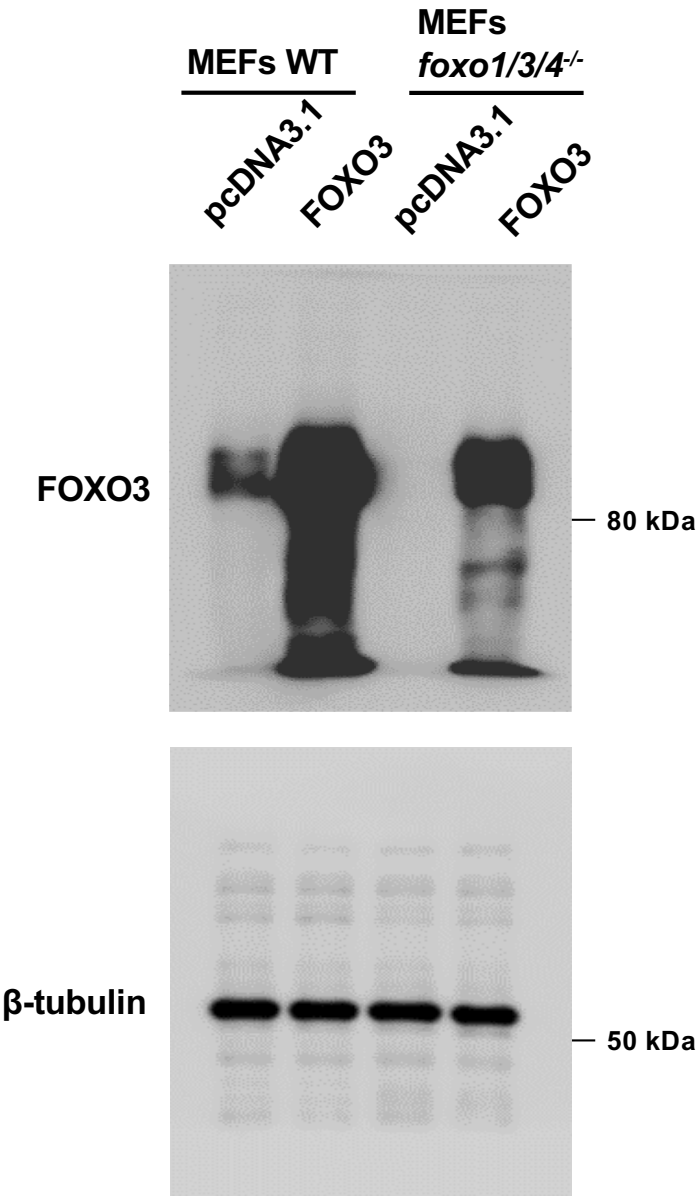

**Supplementary Fig. S7N**  
Original blots for the cropped/composite for  
Supplementary Fig S2B

Supplementary Fig. S7O

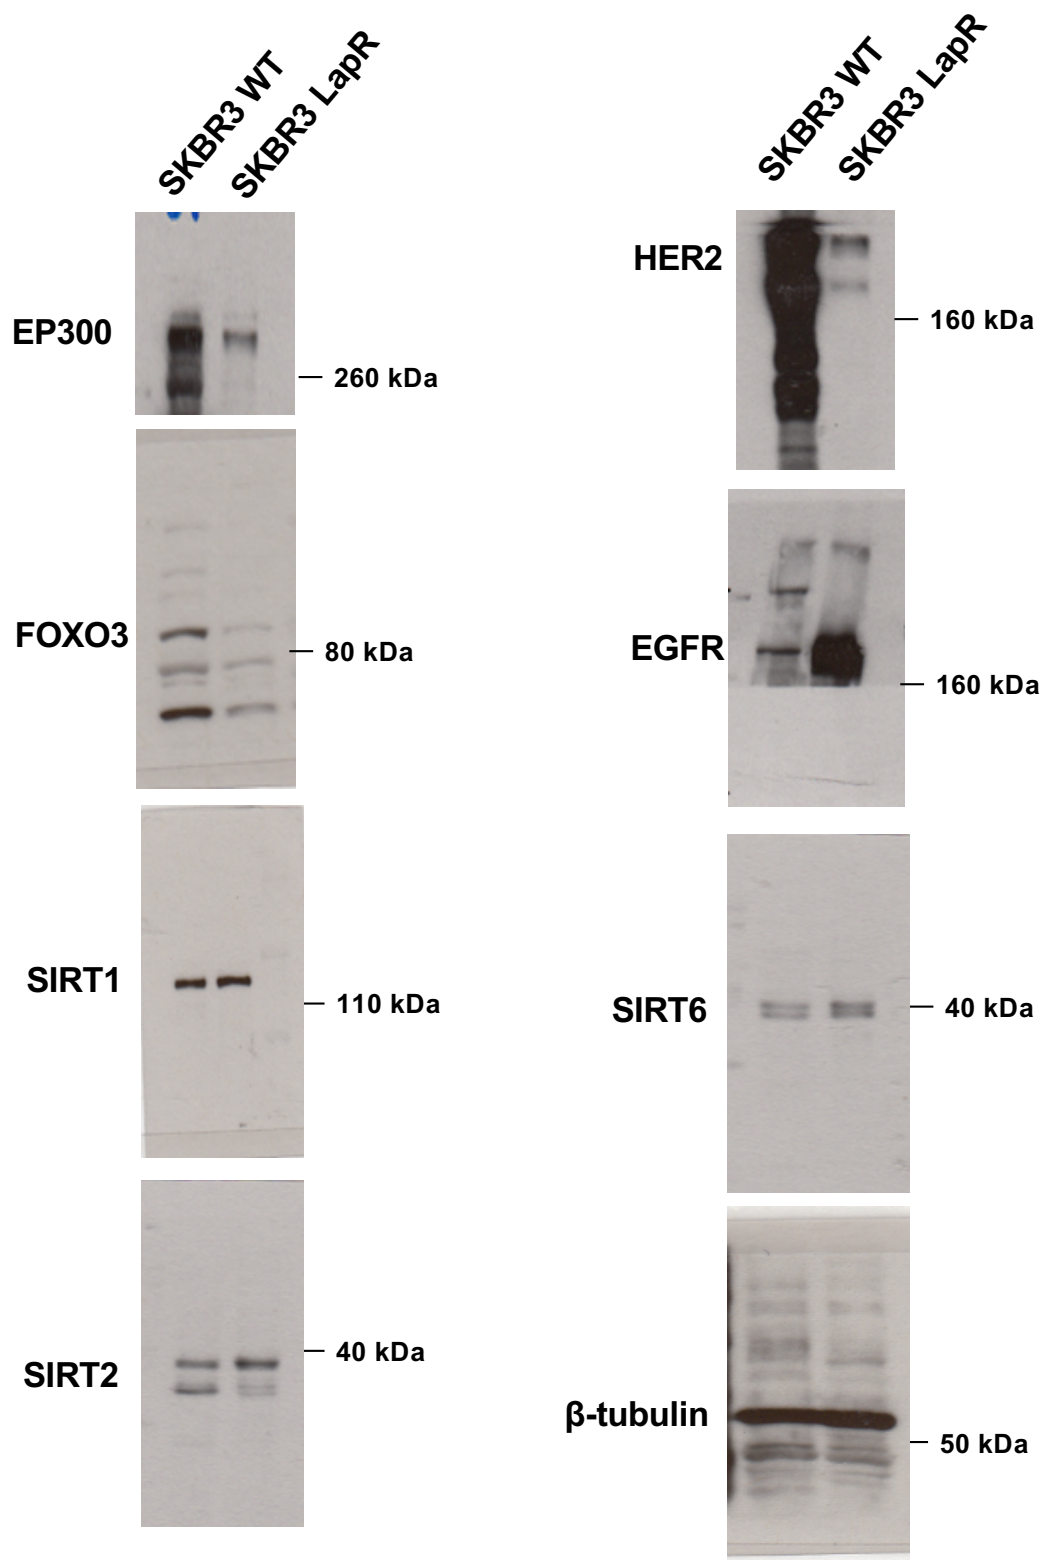

**Supplementary Fig. S7O**  
Original blots for the cropped/composite for Supplementary Fig S4A

Supplementary Fig. S7P

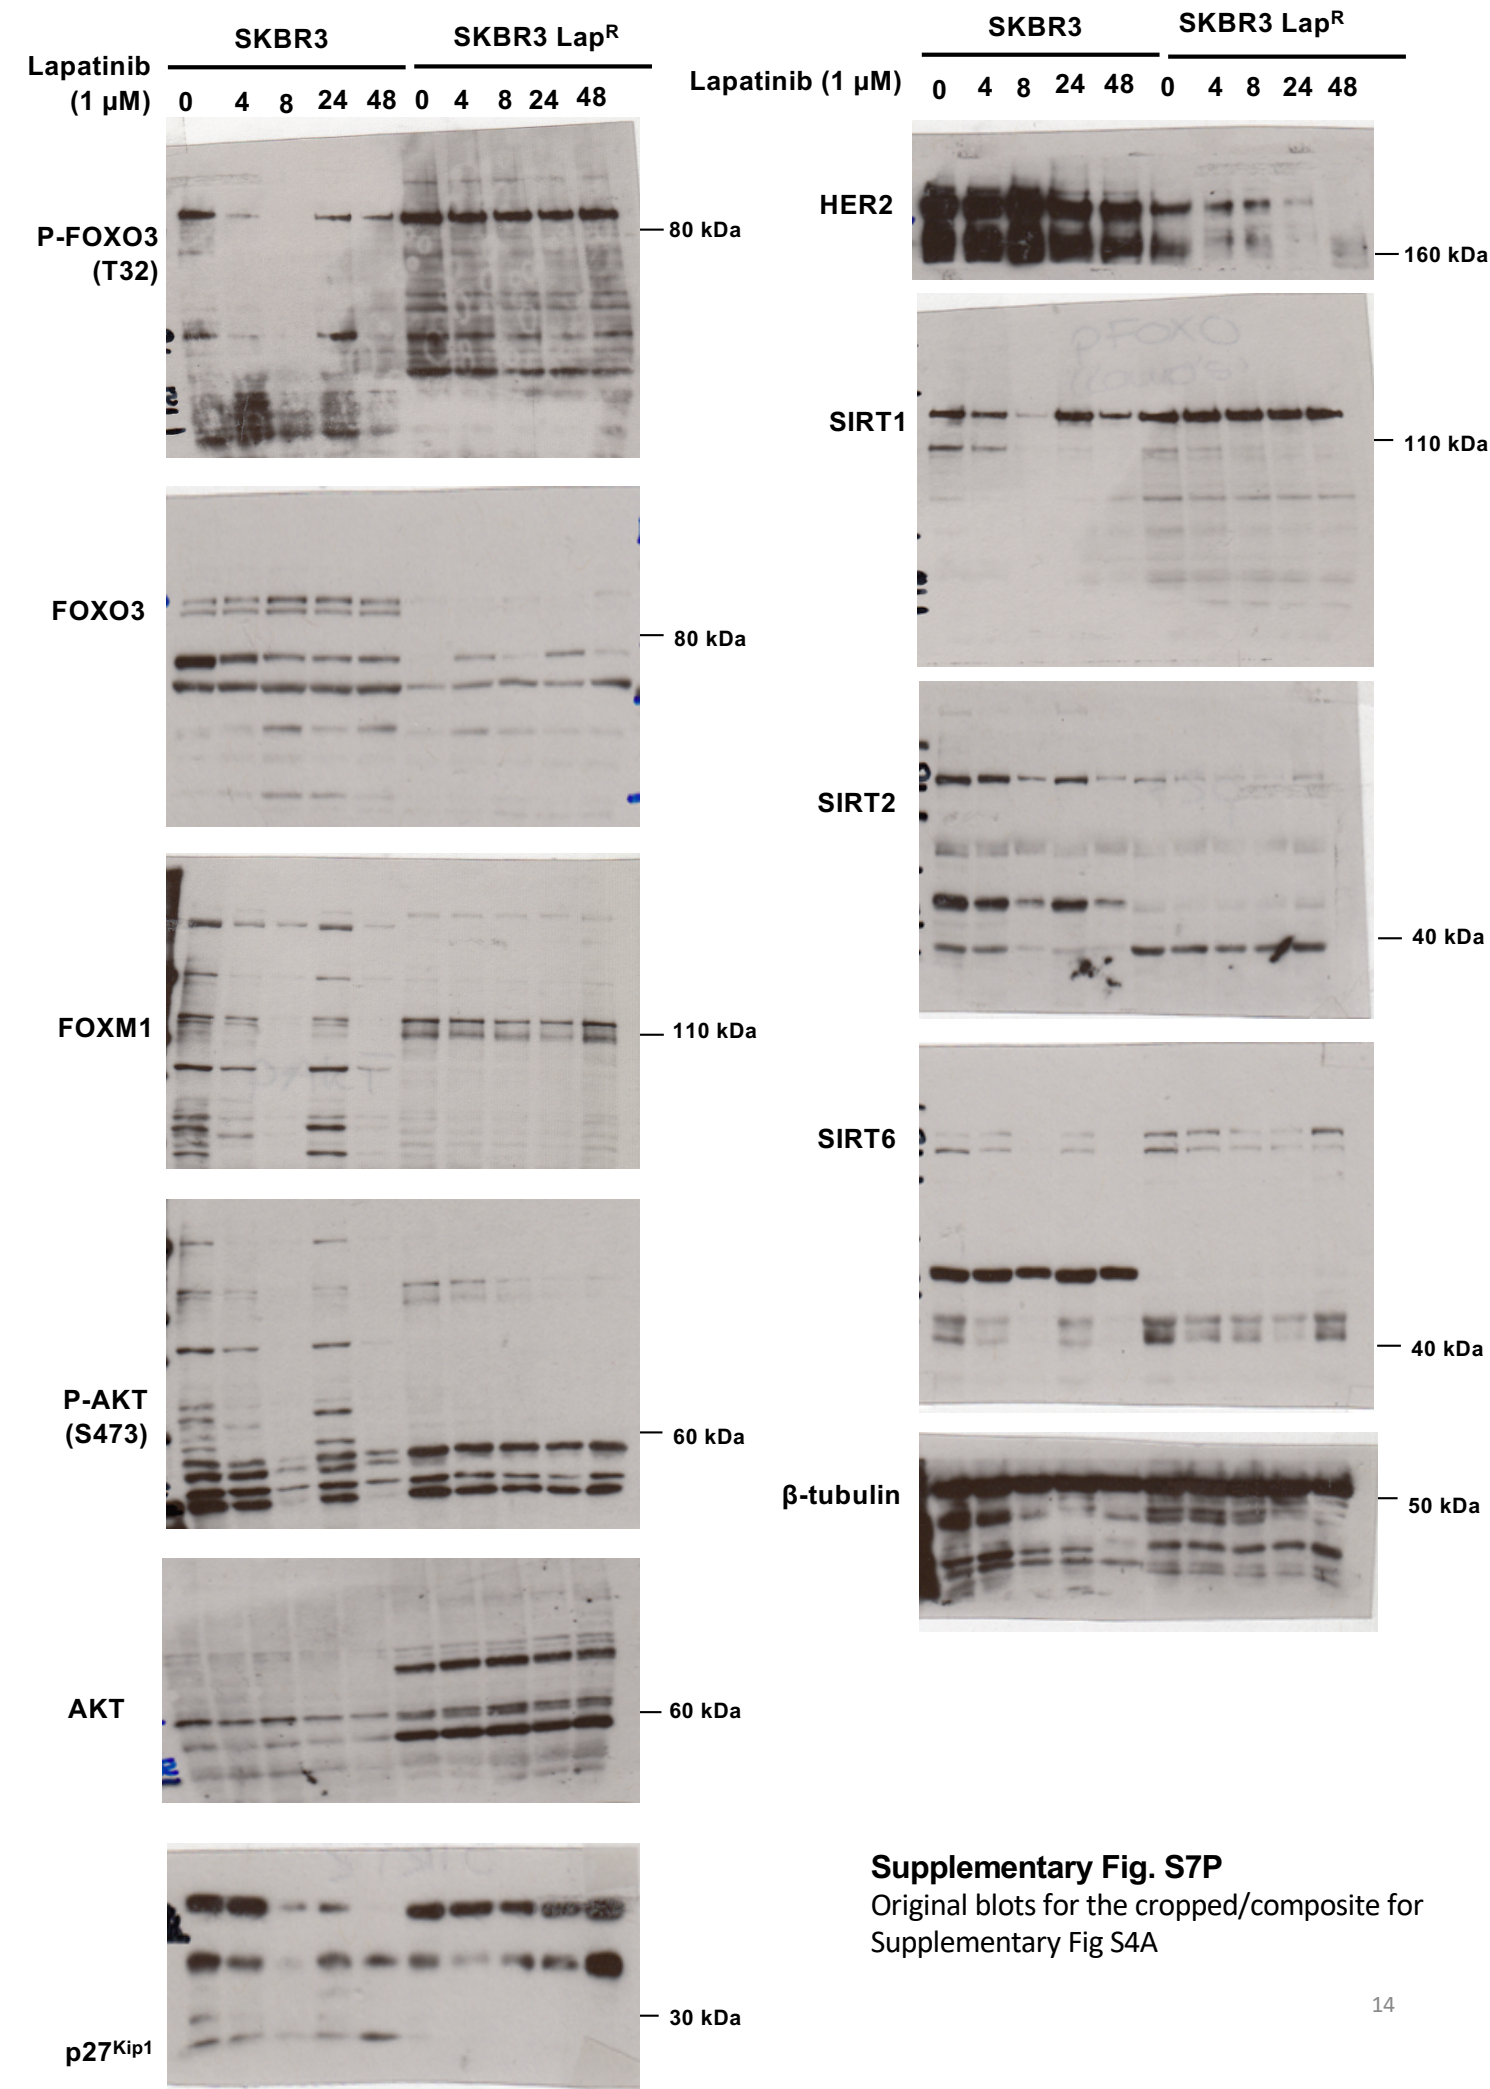

Supplementary Fig. S7P  
Original blots for the cropped/composite for  
Supplementary Fig S4A



# Supplementary Fig. S7Q

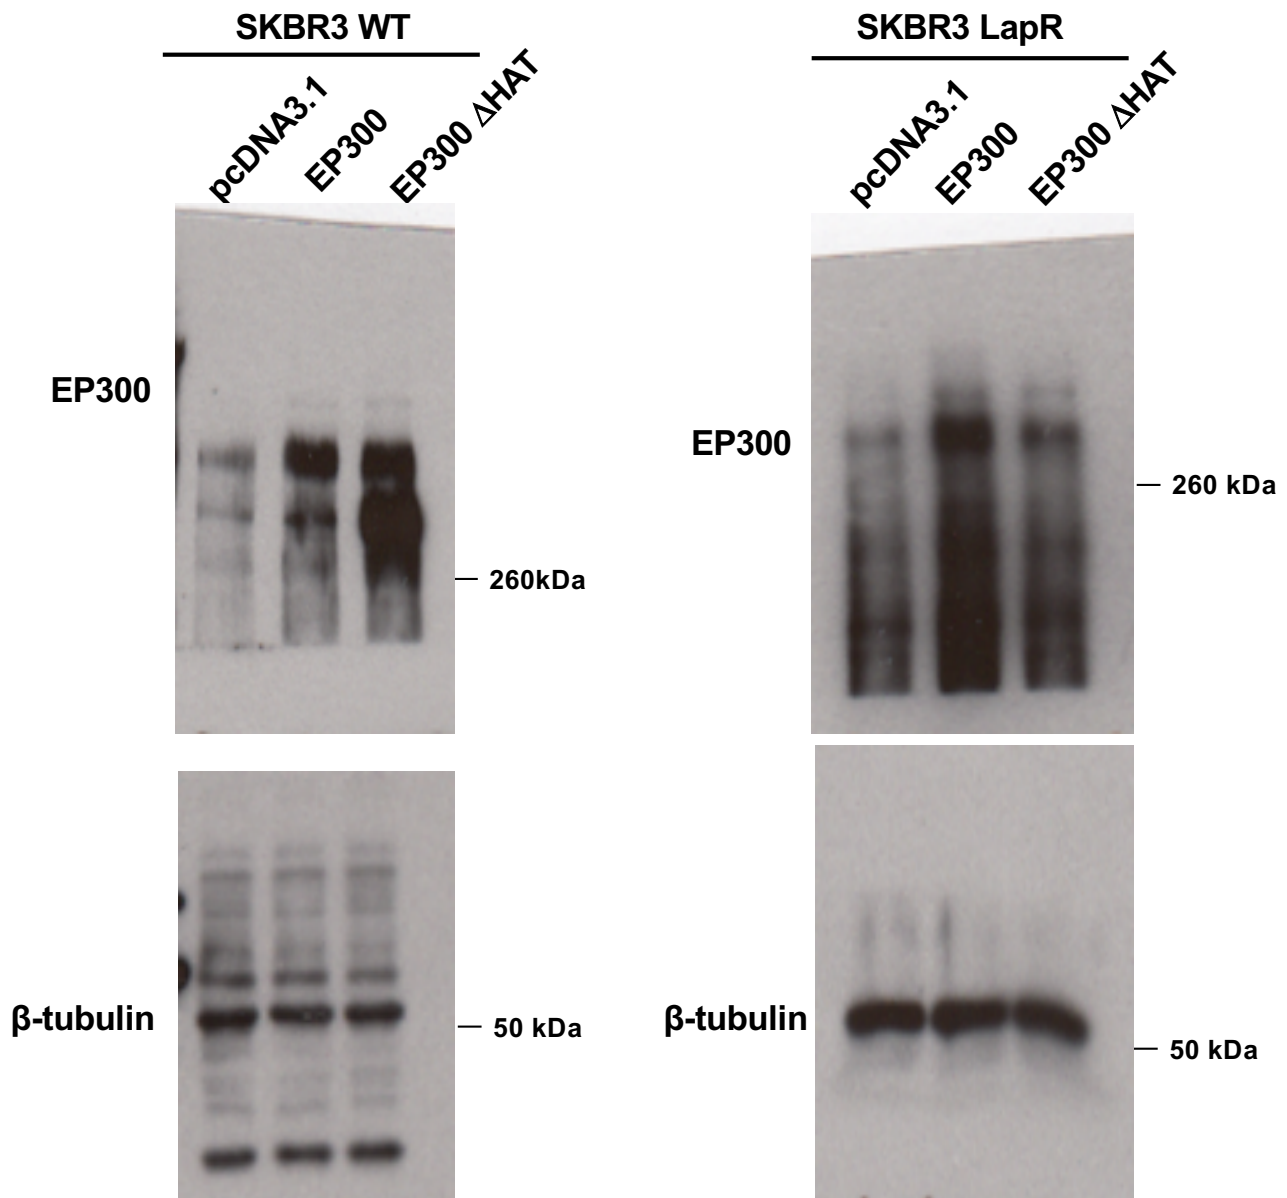

## Supplementary Fig. S7Q

Original blots for the cropped/composite for Supplementary Fig S4B
