# Supplementary material for: EP300 and SIRT1/6 Co-Regulate Lapatinib Sensitivity Via Modulating FOXO3-Acetylation and Activity in Breast Cancer
Source: MDPI journal article supplement (doi:10.3390/cancers11081067), 2019-07-28
Supplement: s1 [file s1]

## Supplementary Figure S1

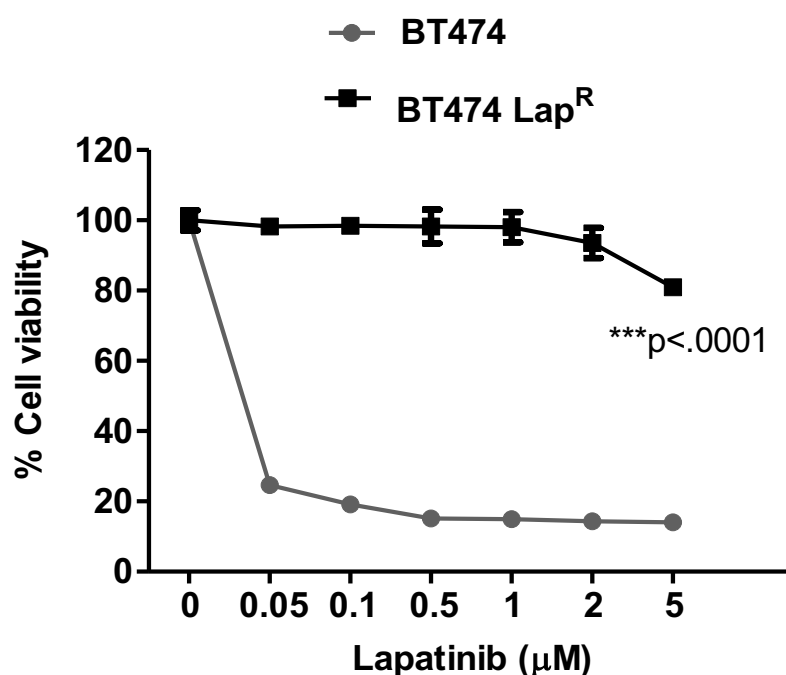

### Supplementary figure S1. Validation of Lapatinib resistance in BT474 Lap<sup>R</sup> cells

BT474 and BT474 Lap<sup>R</sup> cells were seeded in 96-well plates and treated with lapatinib at a range of concentration from 0.05 to 5 μM. Twenty-four hours after treatment, cells were fixed and stained with the protein-binding dye SRB. Values obtained were normalised against the corresponding untreated controls and presented as percentages (The cell survival value was normalized to 100% both untreated cells). Bars represent the mean ± SEM of three independent transfection experiments (n=3, R=3) and statistical analysis was performed using 2-way ANOVA (\*\*\*)  $p < 0.001$ , significant),
