# Supplementary material for: EP300 and SIRT1/6 Co-Regulate Lapatinib Sensitivity Via Modulating FOXO3-Acetylation and Activity in Breast Cancer
Source: MDPI journal article supplement (doi:10.3390/cancers11081067), 2019-07-28
Supplement: s1 [file s1]

Supplementary Fig. S8A

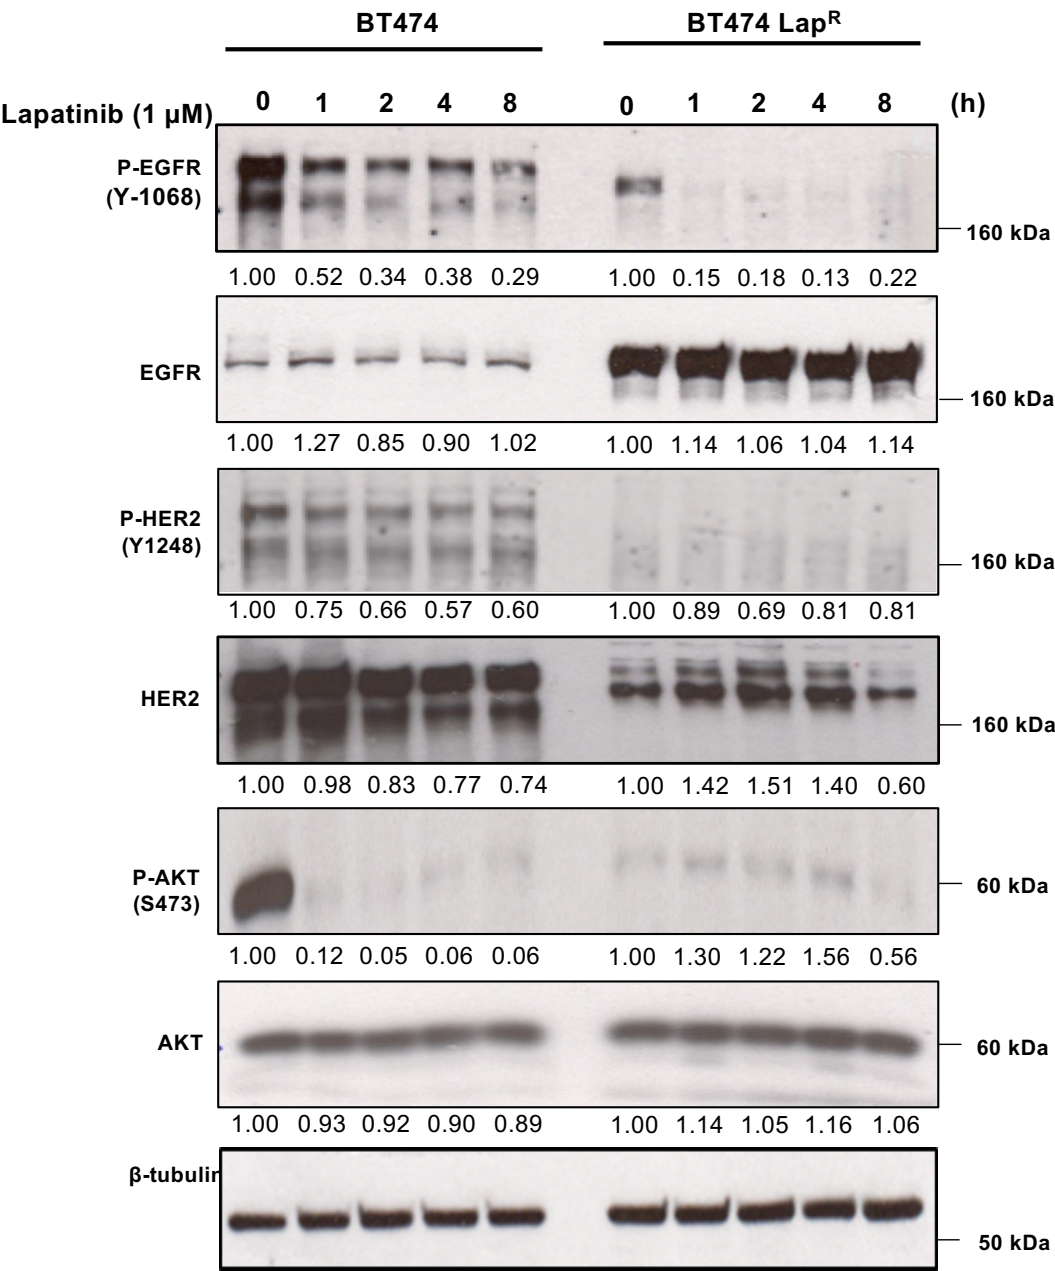

**Supplementary Figure S8A.**  
Protein quantification is performed by ImageJ analysis from Figure 1A

Supplementary Fig. S8B

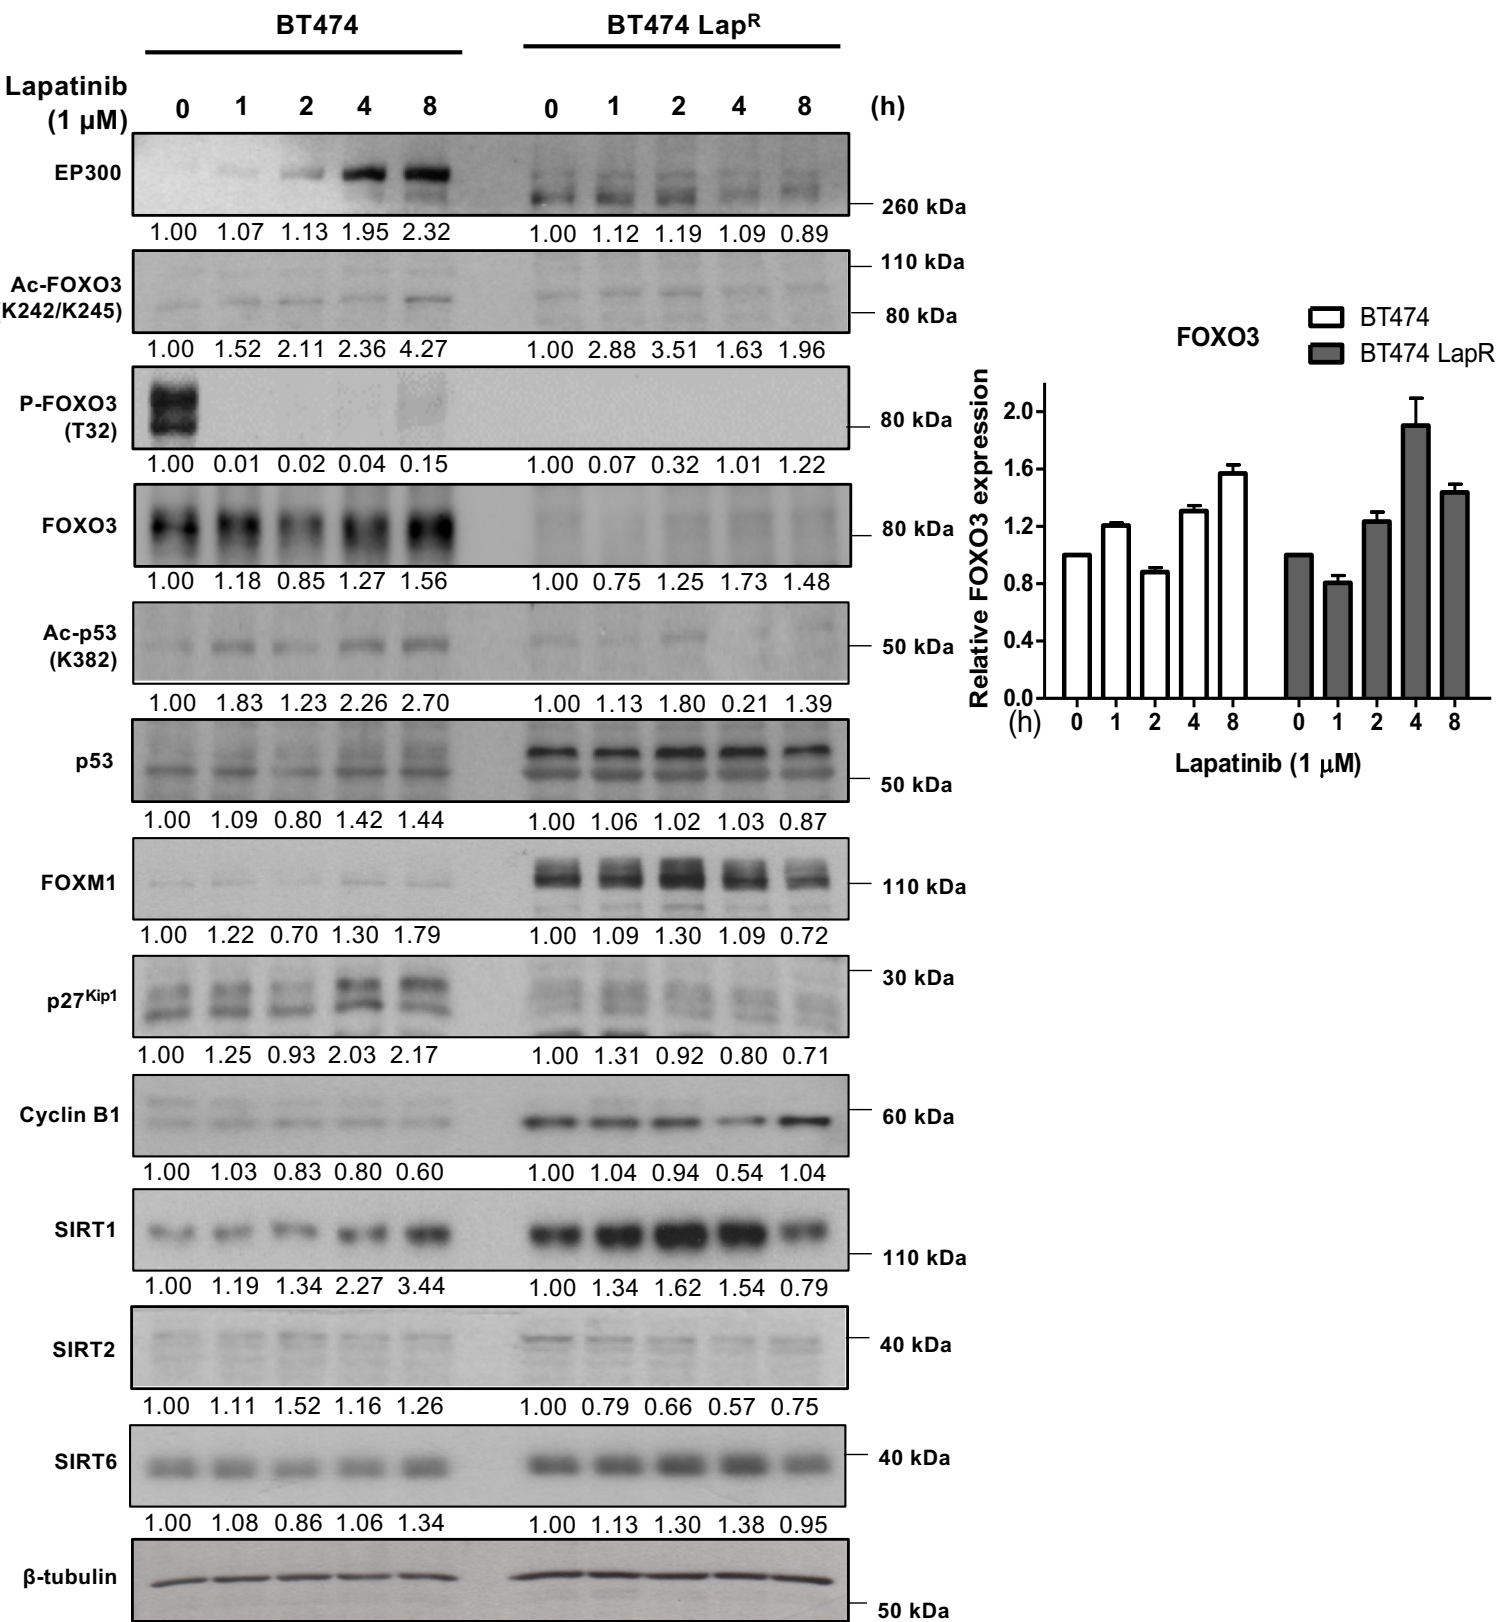

Supplementary Figure S8B.

Protein quantification is performed by ImageJ analysis from Figure 1B (Left panel). FOXO3 protein quantification is shown in bar diagram with mean+/-SEM from three independent experiments (Right Panel).

Supplementary Fig. S8C

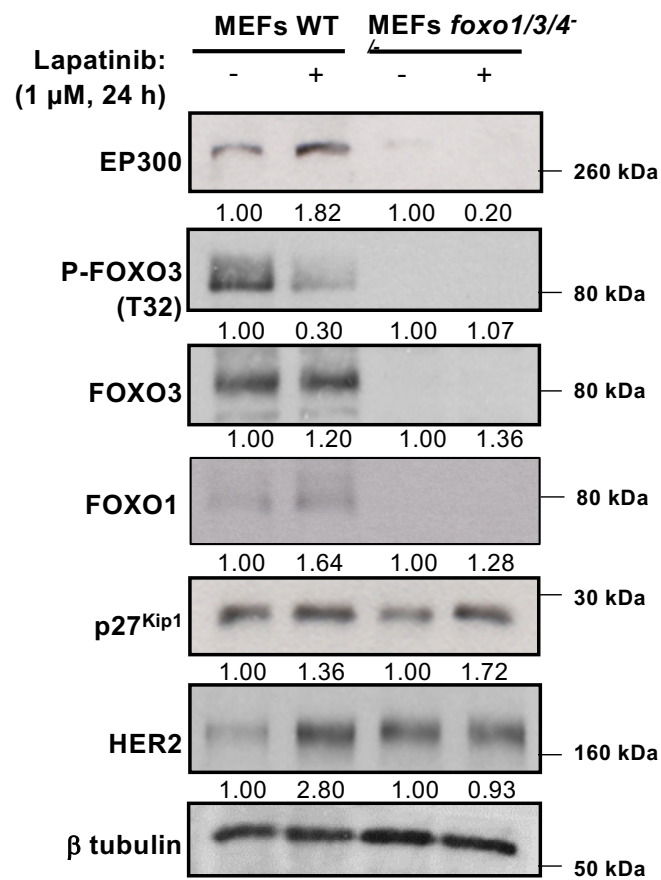

**Supplementary Figure S8C**  
Protein quantification is performed by ImageJ analysis from Figure 2B

Supplementary Fig. S8D

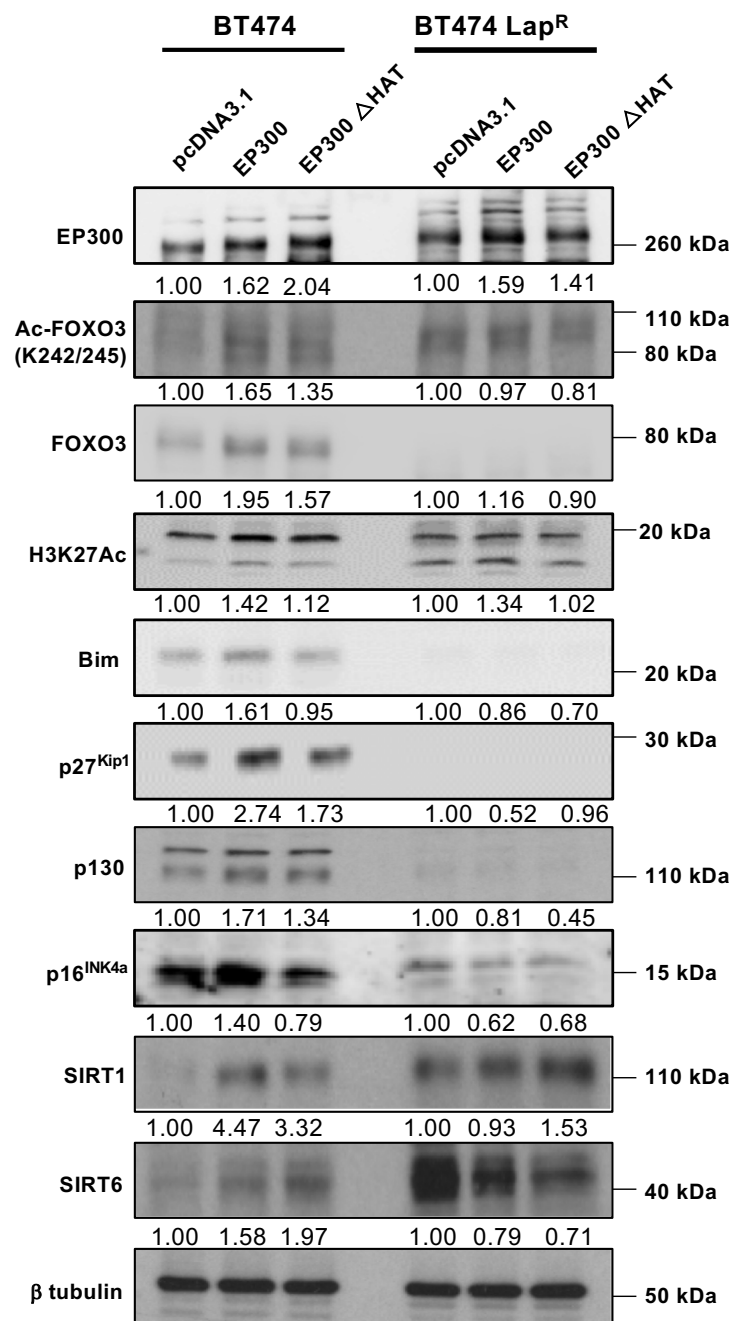

**Supplementary Figure S8D**  
Protein quantification is performed by ImageJ analysis from Figure 4A

Supplementary Fig. S8E

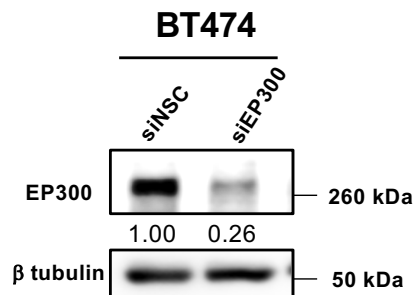

**Supplementary Figure S8E**  
Protein quantification is performed by ImageJ analysis from Figure 5B

Supplementary Fig. S8F

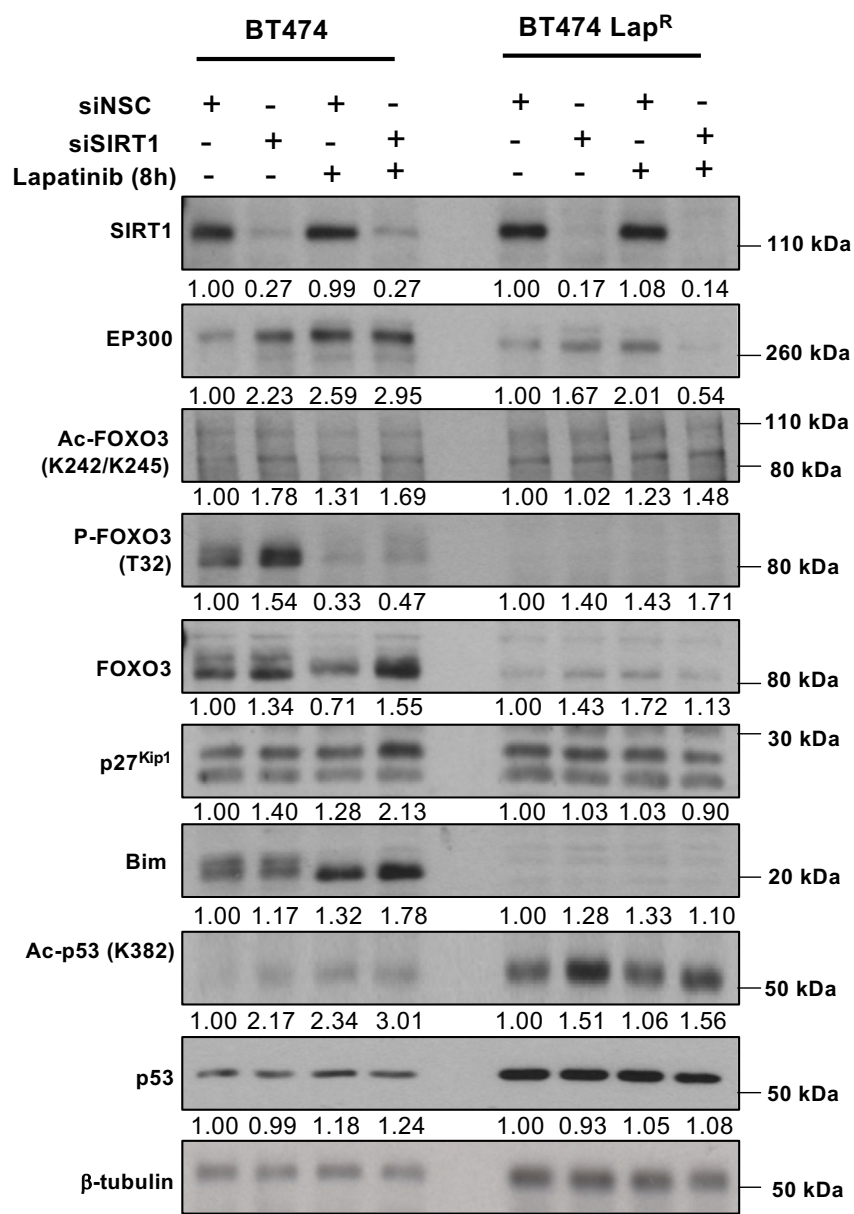

**Supplementary Figure S8F**  
Protein quantification is performed by ImageJ analysis from Figure 6A

Supplementary Fig. S8G

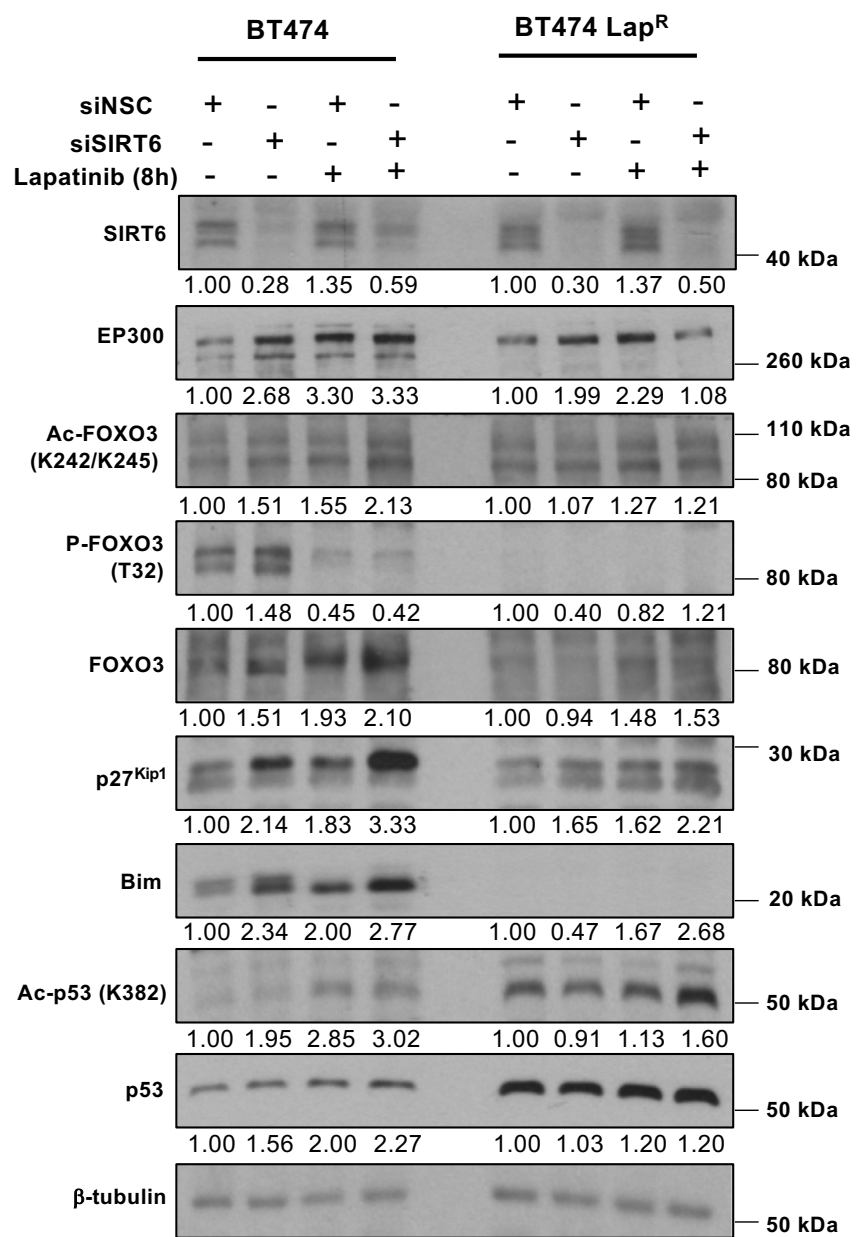

**Supplementary Figure S8G**  
Protein quantification is performed by ImageJ analysis from Figure 6B

Supplementary Fig. S8H

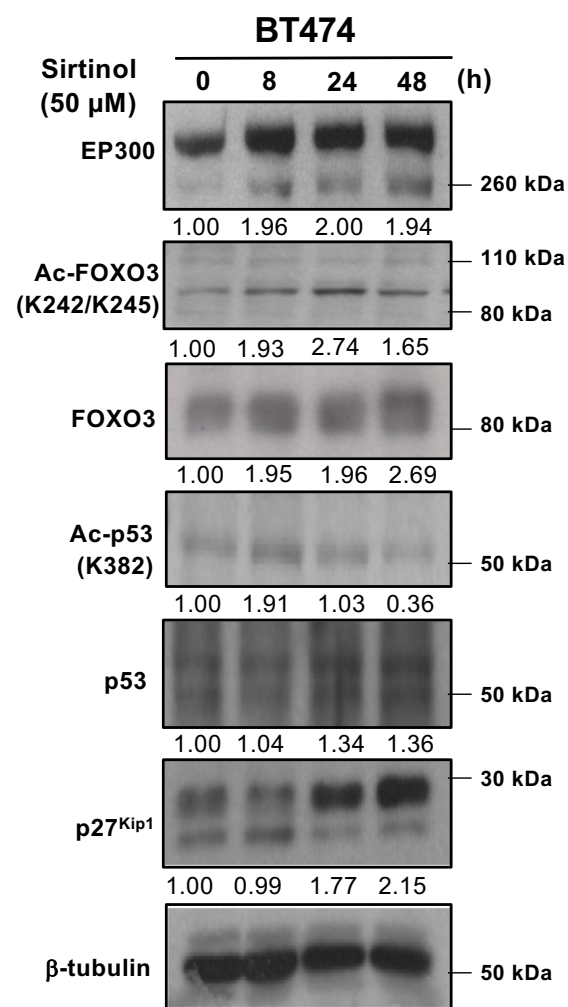

**Supplementary Figure S8H**  
Protein quantification is performed by ImageJ analysis from Figure 7B

Supplementary Fig. S8I

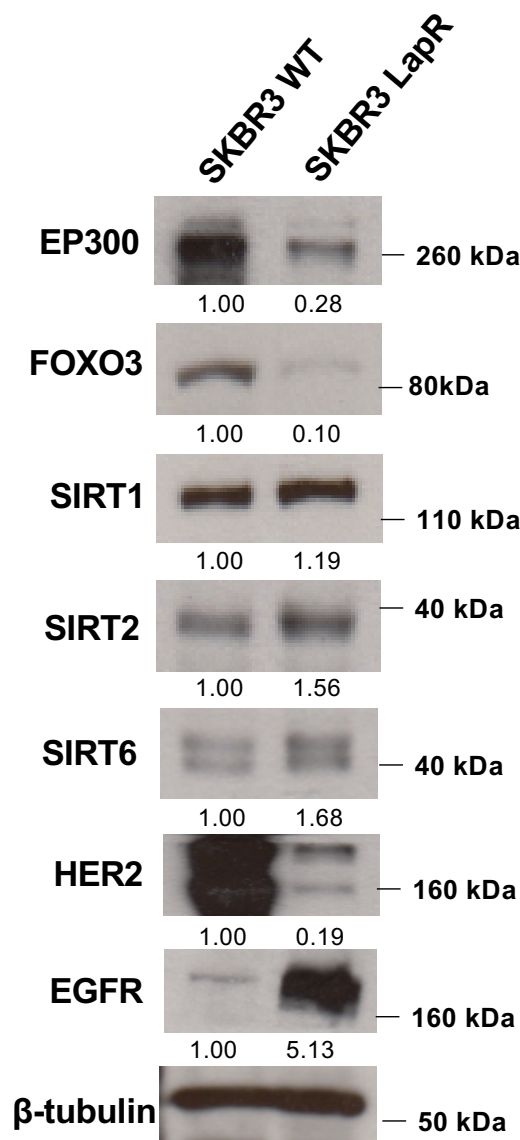

**Supplementary Figure S8I**  
Protein quantification is performed by ImageJ analysis from Figure S7A

Supplementary Fig. S8J

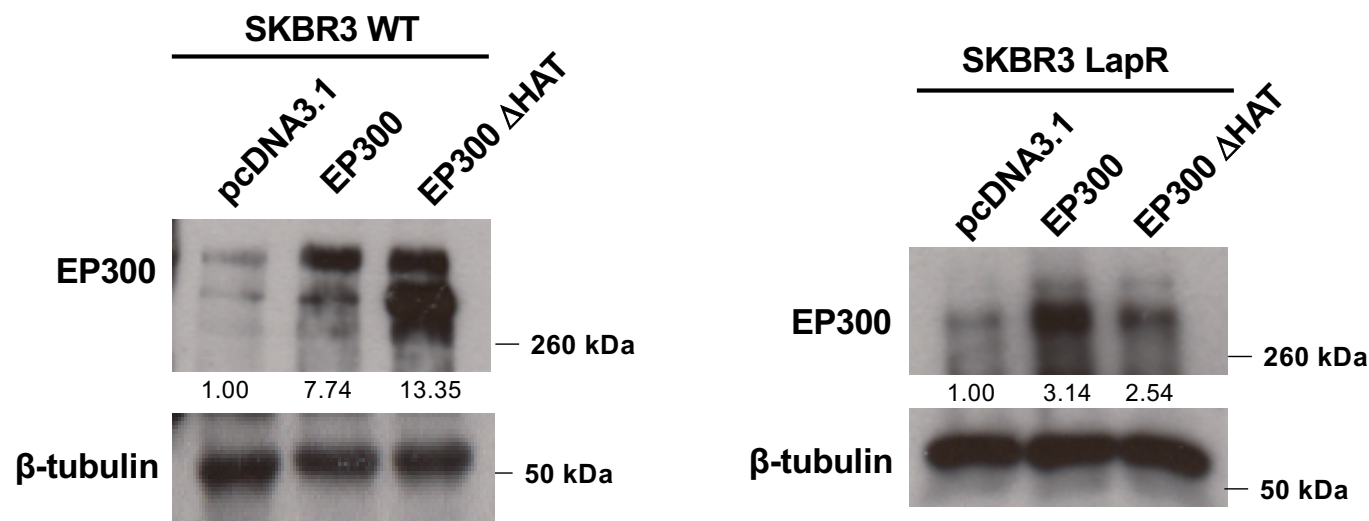

**Supplementary Figure S8J**  
Protein quantification is performed by ImageJ analysis from Figure S7B

Supplementary Fig. S8K

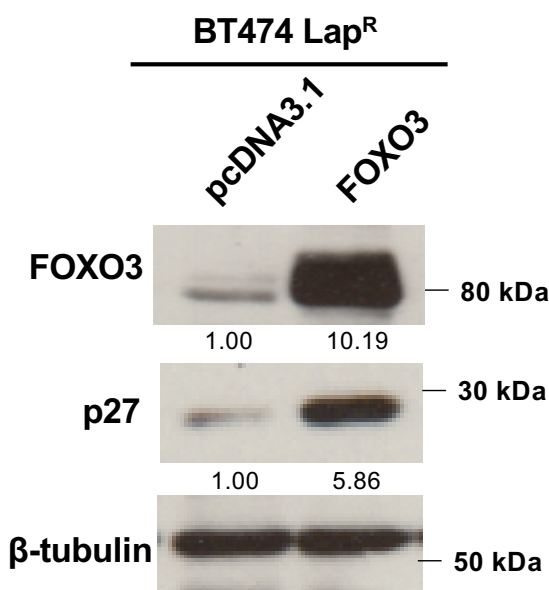

**Supplementary Figure S8K**  
Protein quantification is performed by ImageJ analysis from Figure S2A

Supplementary Fig. S8L

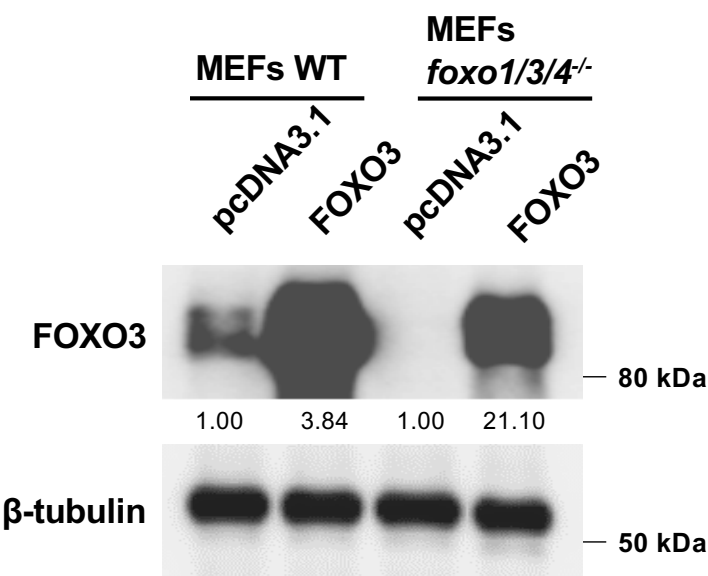

**Supplementary Figure S8L**  
Protein quantification is performed by ImageJ analysis from Figure S2B



Supplementary Fig. S8M

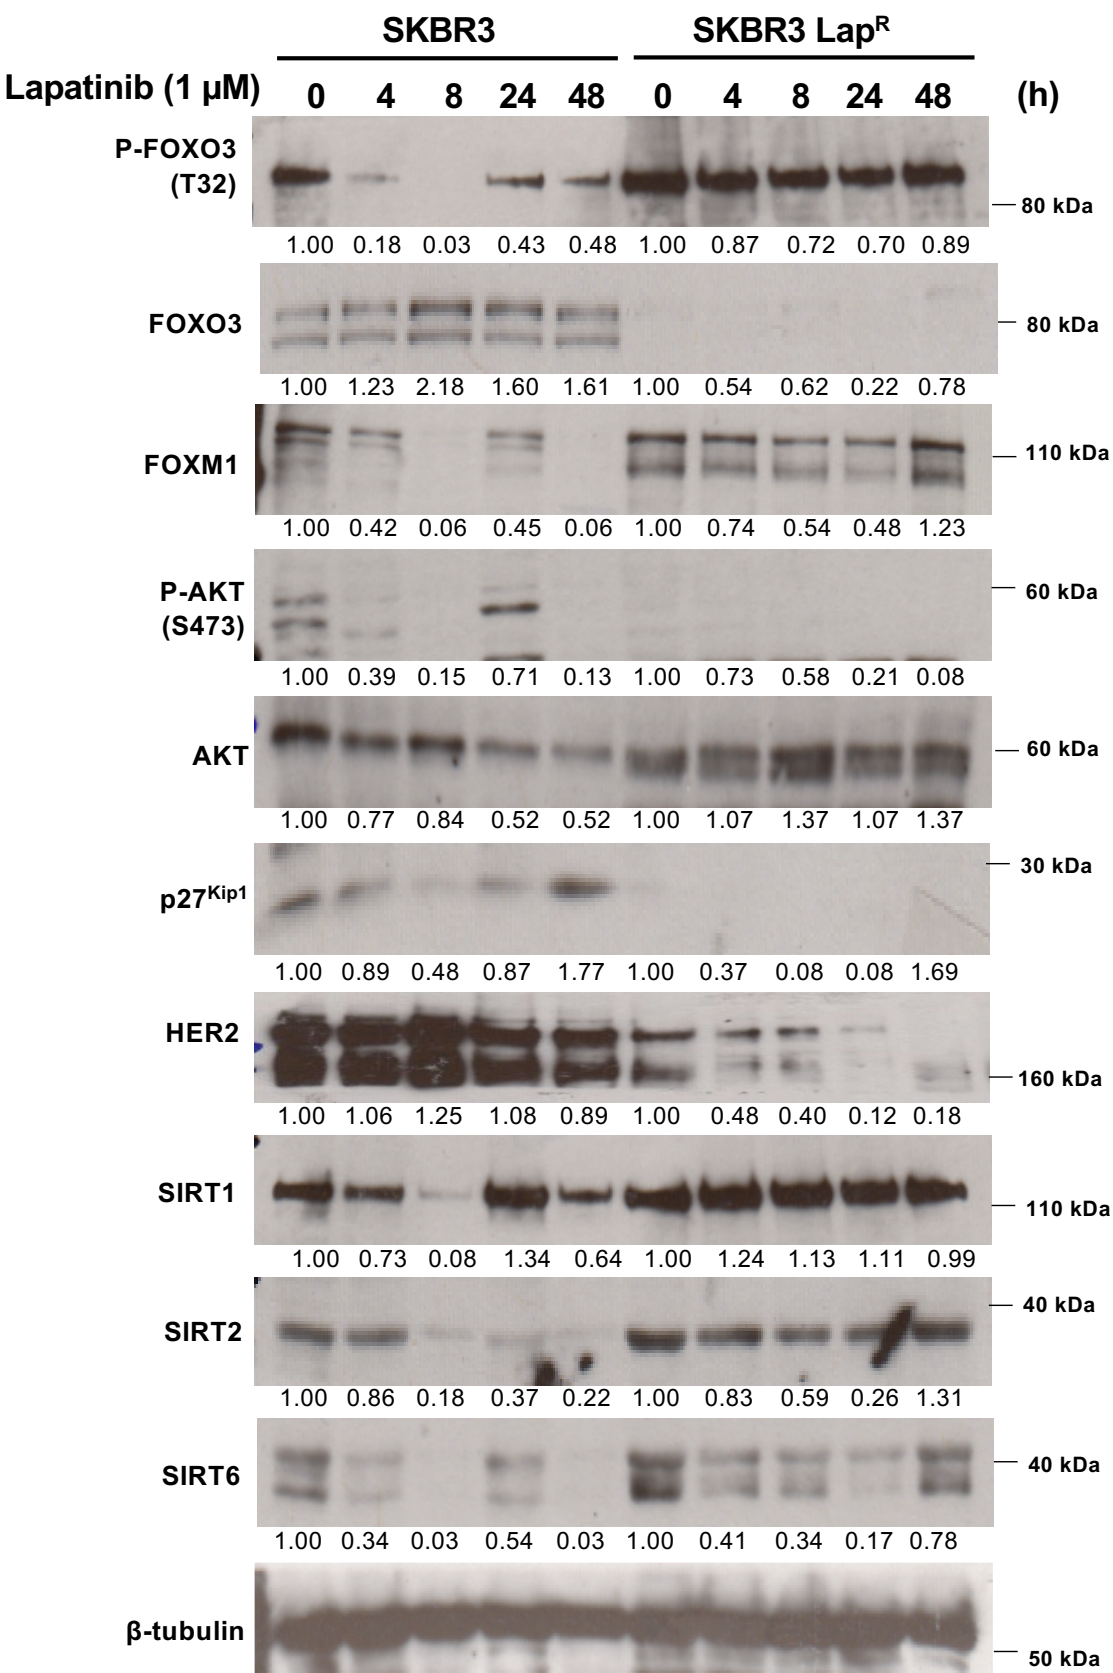

**Supplementary Figure S8M**  
Protein quantification is performed by ImageJ analysis from Figure S4A
