# Supplementary material for: EP300 and SIRT1/6 Co-Regulate Lapatinib Sensitivity Via Modulating FOXO3-Acetylation and Activity in Breast Cancer
Source: MDPI journal article supplement (doi:10.3390/cancers11081067), 2019-07-28
Supplement: s1 [file s1]

Supplementary Fig. S4A

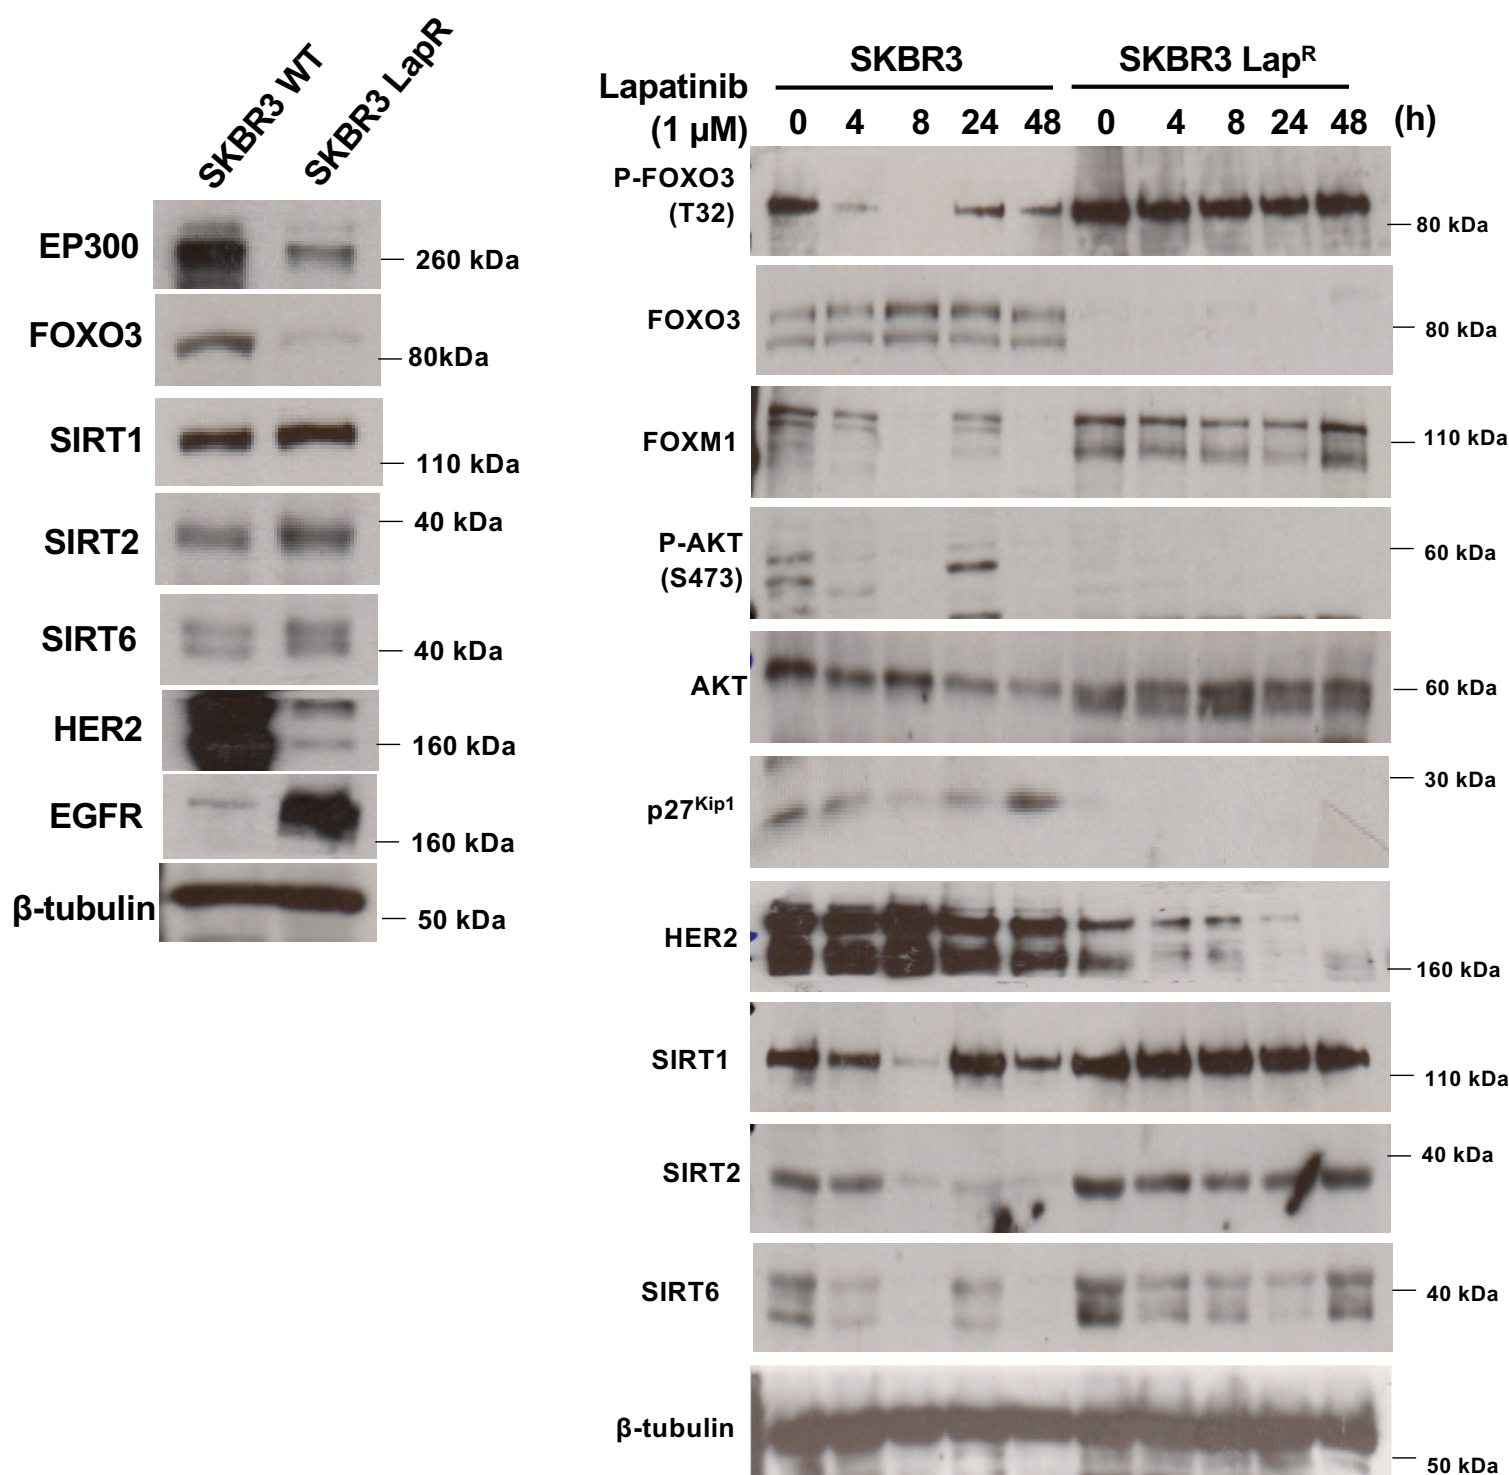

**Supplementary Fig. S4A**

The sensitive (SKBR3) and lapatinib resistant SKBR3 Lap<sup>R</sup> cells were either left untreated or treated with 1  $\mu$ M Lapatinib for the mentioned time points. Protein lysates from whole-cell extracts were then analysed by western blotting using the antibodies against the proteins indicated. Molecular weight markers are shown.

Supplementary Fig. S4B

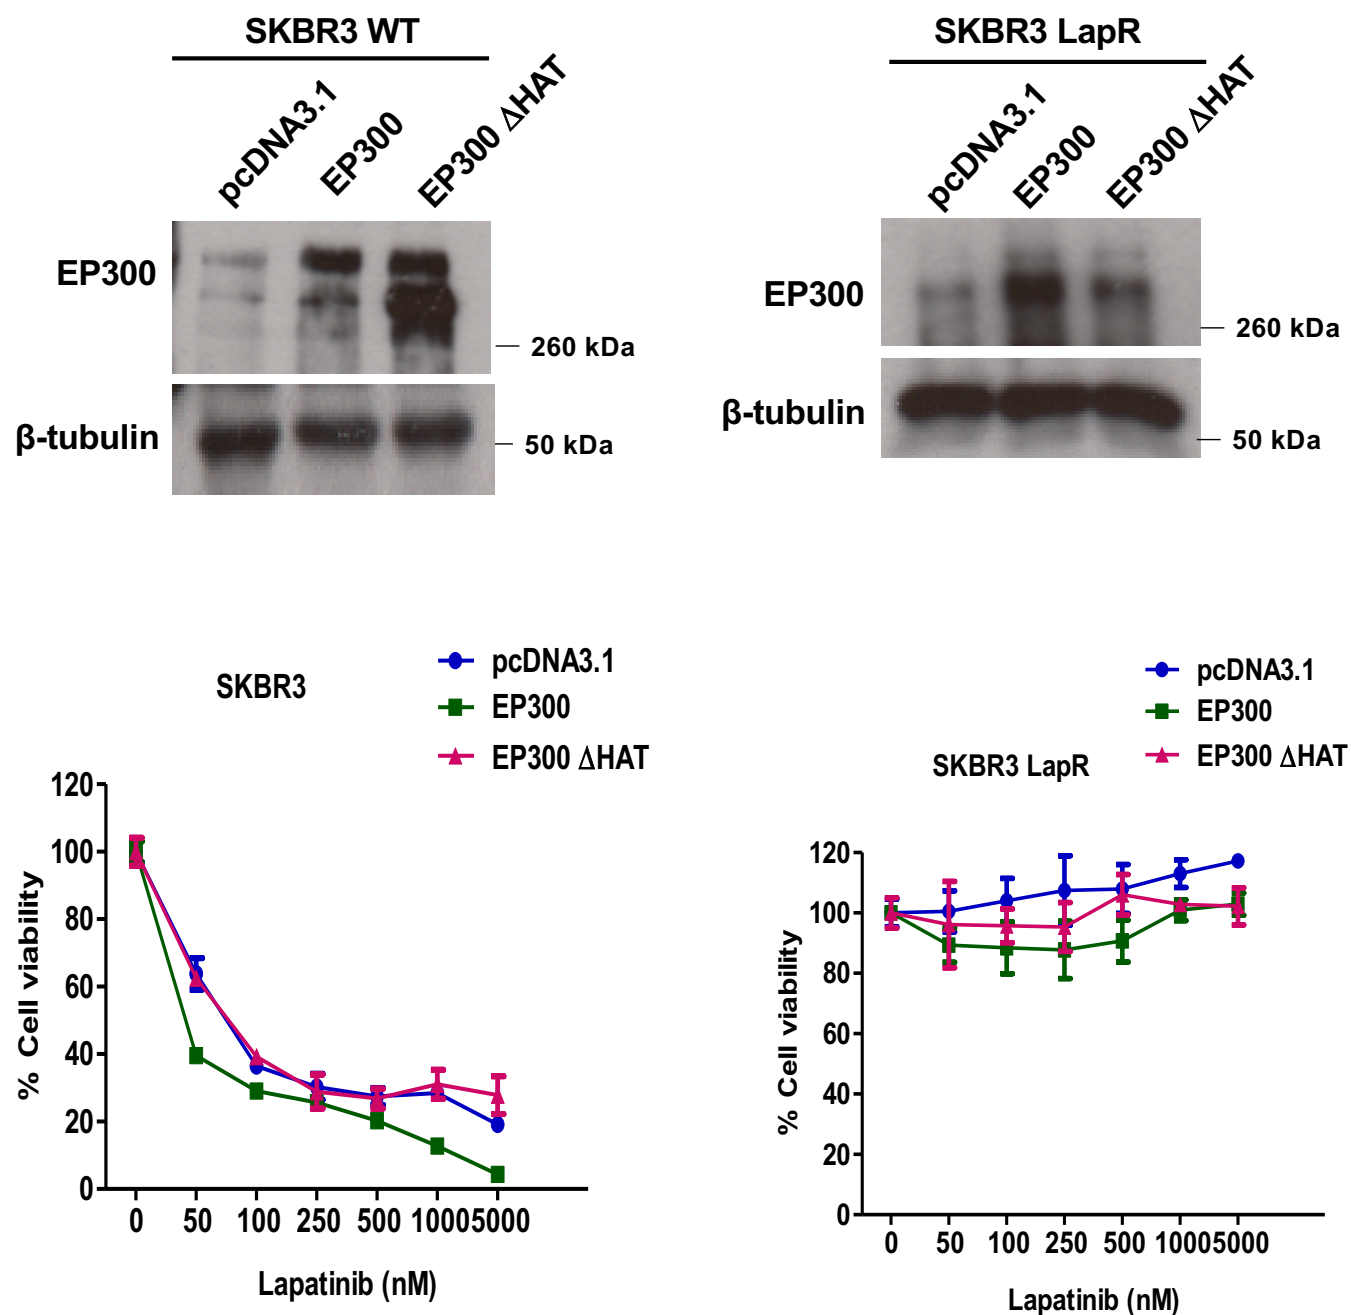

**Supplementary Fig. S4B**  
SKBR3 and SKBR3 Lap<sup>R</sup> cells were transiently transfected with the empty vector pcDNA3.1, the plasmid encoding wild-type EP300, or the one encoding for its acetyl-transferase mutant derivative (EP300  $\Delta$ HAT). Transiently transfected SKBR3 WT and Lap<sup>R</sup> cells were seeded in 96-well plates and treated with lapatinib at a range of concentrations from 50 to 5000 nM. Twenty-four hours after treatment, cells were fixed and stained with the protein-binding dye SRB. Values obtained were normalized against the corresponding untreated controls and presented as percentages. Data represent means  $\pm$  SEM (2-way ANOVA; non-significant, ns; significant, \*\*P<0.01). Moreover, proteins were obtained from whole cell extracts after 24 hours following transfection. Western blotting was performed using the protein lysates to assess the expression levels of EP300.
