# Supplementary material for: EP300 and SIRT1/6 Co-Regulate Lapatinib Sensitivity Via Modulating FOXO3-Acetylation and Activity in Breast Cancer
Source: MDPI journal article supplement (doi:10.3390/cancers11081067), 2019-07-28
Supplement: s1 [file s1]

## Supplementary Figure S3

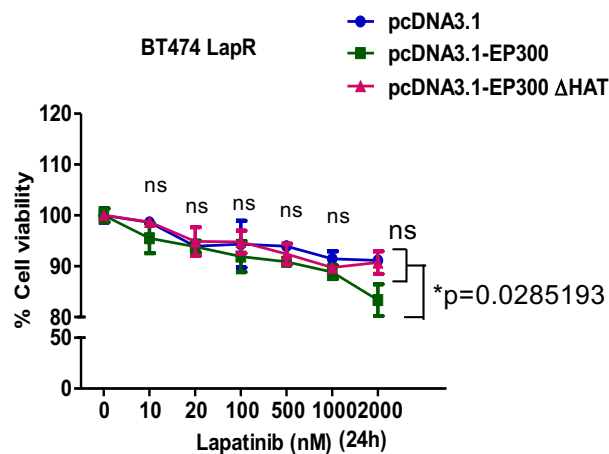

### Supplementary figure S3. Overexpression of EP300 or EP300 $\Delta$ HAT does not affect Lapatinib resistance in BT474 cells

BT474 Lap<sup>R</sup> cells transfected with EP300 or EP300  $\Delta$ HAT were seeded in 96-well plates and treated with lapatinib at a range of concentration from 10 to 2000 nM. 24 hours after treatment, cells were fixed and stained with the protein-binding dye SRB. Values obtained were normalised against the corresponding untreated controls and presented as percentages. Bars represent the mean  $\pm$  SEM of three independent transfection experiments (n=3, R=3) and statistical analysis was performed using 1-way ANOVA and tukey post-hoc analysis (ns, not significant; \*p<0.05, significant), showing that EP300 overexpression has an effect on lapatinib sensitivity at 2000 nM.
